# Supplementary material for: N-Substitution of acridone with electron-donating groups: crystal packing, intramolecular charge transfer and tuneable aggregation induced emission
Source: Royal Society of Chemistry journal article supplement (doi:10.1039/c9ra10615d), 2020-01-01
Supplement: c9ra10615d1.pdf [file c9ra10615d1.pdf]

## Table of Contents

|                                                               |            |
|---------------------------------------------------------------|------------|
| <b>1. General remarks.....</b>                                | <b>S2</b>  |
| <b>2. Experimental part.....</b>                              | <b>S2</b>  |
| <b>3. X-ray crystallographic structure determination.....</b> | <b>S4</b>  |
| <b>4. NMR spectra .....</b>                                   | <b>S7</b>  |
| <b>5. UV/vis and fluorescence spectra .....</b>               | <b>S10</b> |
| <b>6. CV spectra.....</b>                                     | <b>S20</b> |
| <b>7. Particle size distribution.....</b>                     | <b>S21</b> |
| <b>8. Calculations.....</b>                                   | <b>S23</b> |
| <b>9. References .....</b>                                    | <b>S34</b> |

## 1. General Remarks

All reagents and solvents were commercially available and were used without further purification unless otherwise noted. For thin layer chromatography Silica gel 60 F254 plates from Merck were used and examined under UV-light irradiation (254 nm and 365 nm). Flash column chromatography was performed on silica gel (particle size: 200-300 mesh). IR-Spectra were recorded as KBr-pellets on a Bruker VERTEX 80V spectrometer. NMR spectra were taken on a Bruker AVANCE III HD (600MHz). Chemical shifts ( $\delta$ ) are reported in parts per million (ppm) relative to traces of  $\text{CHCl}_3$  in the corresponding deuterated solvent. HRMS experiments were carried out on a Bruker Fourier Transform Solarix XR. Absorption spectra were recorded on a Shimadzu UV2600. Emission spectra and absolute quantum yields were measured on FluoroMax-4 spectrometer equipped with an integral sphere. The particle distribution was measured on a Malvern Zetasizer Nano ZS. Electrochemical data were obtained in dichloromethane or tetrahydrofuran solution of tetrabutylammonium hexafluorophosphate (0.1 M) and ferrocene was used as an internal standard. Cyclic voltammograms were obtained using a glassy carbon working electrode, a platinum counter electrode, and a Ag reference electrode tested on CHI660E station.

Acridone,<sup>S1</sup> 4-bromo-*N,N*-bis(4-methoxyphenyl)aniline<sup>S2</sup> and 4'-bromo-*N,N*-bis(4-methoxyphenyl)-[1,1'-biphenyl]-4-amine<sup>S3</sup> were prepared according to the reported methods.

## 2. Experimental part

### General Procedure (GP) for the cross coupling reactions of acridone and bromide.

An 8 or 120 mL screw capped glass vial was charged with acridone **1**, bromide, CuI, 2,2,6,6-tetramethylheptane-3,5-dione,  $\text{K}_2\text{CO}_3$  and dry DMF. The mixture was heated at 150 °C for 48 hours. After cooling down to room temperature, the mixture was diluted with dichloromethane (150 mL) and washed with water (6×200 mL) and dried over  $\text{Na}_2\text{SO}_4$ . The solvent was removed by a rotatory evaporation and the crude product was purified by silica gel column chromatography to give the product **2**.

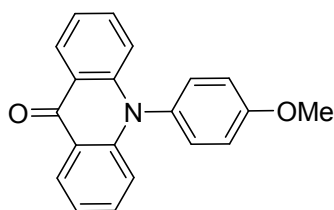

According to GP, an 8 mL glass vial, acridone (390 mg, 2 mmol), 4-bromoanisole (561 mg, 3 mmol), CuI (39 mg, 0.2 mmol), 2,2,6,6-tetramethylheptane-3,5-dione (73 mg, 0.4 mmol),  $\text{K}_2\text{CO}_3$  (414 mg, 3 mmol) and dry DMF (3 mL), after workup, silica gel column (dichloromethane), the product **2a** was obtained as light yellow solid (463 g, 77 %). m.p. 232 °C.  $^1\text{H}$  NMR (600 MHz,  $\text{CD}_2\text{Cl}_2$ )  $\delta$  (ppm) = 8.50 (d,  $J$  = 8.0 Hz, 2H), 7.52 (ddd,  $J$  = 8.5, 6.9, 1.6 Hz, 2H), 7.29-7.25 (m, 4H), 7.20 (d,  $J$  = 8.8 Hz, 2H), 6.85 (d,  $J$  = 8.6 Hz, 2H), 3.94 (s, 3H).  $^{13}\text{C}$  NMR (150 MHz,  $\text{CD}_2\text{Cl}_2$ )  $\delta$  (ppm) = 178.1, 160.7, 144.0, 133.5, 131.8, 131.4, 127.3, 122.3, 121.7, 117.5, 116.6, 56.1. IR (KBr)  $\tilde{\nu}$  ( $\text{cm}^{-1}$ ) = 3104, 3064, 3050, 3037, 3002, 2960, 2937, 2836, 1631, 1596, 1512, 1490, 1457, 1361, 1348, 1294, 1270, 1249, 1182, 1162, 1106, 1029, 937, 839, 763, 756, 675, 621, 549, 530. HRMS(ESI) ( $m/z$ ) :  $[\text{M}+\text{H}]^+$  calcd. for  $\text{C}_{20}\text{H}_{16}\text{NO}_2$ , 302.11755; found, 302.11740.

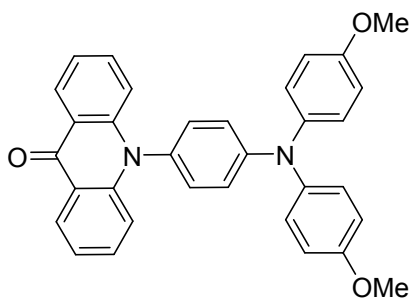

According to **GP**, a 120 mL glass vial, acridone (976 mg, 5 mmol), 4-bromo-*N,N*-bis(4-methoxyphenyl)aniline (2.11 g, 5.5 mmol), CuI (95 mg, 0.5 mmol), 2,2,6,6-tetramethylheptane-3,5-dione (184 mg, 1 mmol), K<sub>2</sub>CO<sub>3</sub> (1.04 g, 7.5 mmol) and dry DMF (15 mL), after workup, silica gel column (dichloromethane), the product **2b** was obtained as light yellow solid (2.06 g, 83 %). m.p. 253 °C. <sup>1</sup>H NMR (600 MHz, CD<sub>2</sub>Cl<sub>2</sub>) δ (ppm) = 8.49 (dd, *J* = 8.0, 1.7 Hz, 2H), 7.56 (ddd, *J* = 8.6, 6.9, 1.7 Hz, 2H), 7.27 (ddd, *J* = 7.9, 6.9, 1.0 Hz, 2H), 7.25-7.21 (m, 4H), 7.12-7.08 (m, 4H), 6.99 (dd, *J* = 8.7, 0.9 Hz, 2H), 6.95-6.90 (m, 4H), 3.81 (s, 6H); <sup>13</sup>C NMR (150 MHz, CD<sub>2</sub>Cl<sub>2</sub>) δ (ppm) = 178.1, 157.2, 150.1, 144.1, 140.4, 133.5, 130.5, 130.1, 127.9, 127.2, 122.3, 121.7, 120.5, 117.6, 115.3, 55.9; IR (KBr)  $\tilde{\nu}$  (cm<sup>-1</sup>) = 3060, 3043, 2995, 2952, 2933, 2906, 2831, 1631, 1598, 1504, 1483, 1457, 1359, 1303, 1290, 1268, 1241, 1176, 1159, 1103, 1031, 935, 825, 752, 675, 619, 603, 574, 559, 530; HRMS(ESI) (*m/z*): [M+H]<sup>+</sup> calcd. for C<sub>33</sub>H<sub>27</sub>N<sub>2</sub>O<sub>3</sub>, 499.20162; found, 499.20205.

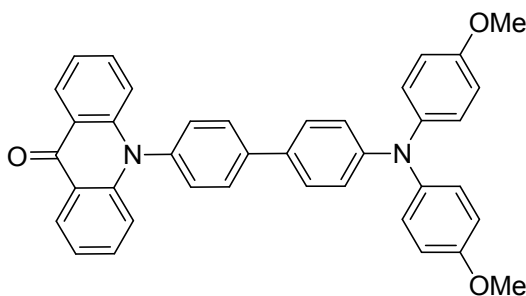

According to **GP**, an 8 mL glass vial, acridone (390 mg, 2 mmol), 4'-bromo-*N,N*-bis(4-methoxyphenyl)-[1,1'-biphenyl]-4-amine (1.01 g, 2.2 mmol), CuI (39 mg, 0.2 mmol), 2,2,6,6-tetramethylheptane-3,5-dione (73 mg, 0.4 mmol), K<sub>2</sub>CO<sub>3</sub> (1.04 g, 7.5 mmol) and dry DMF (3 mL), after workup, silica gel column (dichloromethane), the product **2b** was obtained as light yellow solid (900 mg, 78 %). m.p. 251 °C. <sup>1</sup>H NMR (600 MHz, CD<sub>2</sub>Cl<sub>2</sub>) δ (ppm) = 8.51 (d, *J* = 8.0 Hz, 2H), 7.87 (d, *J* = 7.1 Hz, 2H), 7.56-7.51 (m, 4H), 7.39 (d, *J* = 7.6 Hz, 2H), 7.28 (t, *J* = 7.4 Hz, 2H), 7.12 (d, *J* = 7.9 Hz, 4H), 7.02 (d, *J* = 7.8 Hz, 2H), 6.91-6.88 (m, 6H), 3.81 (s, 6H). <sup>13</sup>C NMR (150 MHz, CD<sub>2</sub>Cl<sub>2</sub>) δ (ppm) = 178.1, 156.8, 149.4, 143.7, 142.5, 140.9, 137.5, 133.6, 131.3, 130.6, 129.1, 128.0, 127.4, 127.3, 122.3, 121.8, 120.4, 117.5, 115.1, 55.9. IR (KBr)  $\tilde{\nu}$  (cm<sup>-1</sup>) = 3070, 3035, 3002, 2958, 2935, 2910, 2833, 1631, 1600, 1506, 1492, 1459, 1357, 1321, 1301, 1276, 1240, 1176, 1105, 1029, 935, 833, 821, 756, 719, 675, 576, 534. HRMS(ESI) (*m/z*): [M+H]<sup>+</sup> calcd. for C<sub>39</sub>H<sub>31</sub>N<sub>2</sub>O<sub>3</sub>, 575.23292; found, 575.23388.

### 3. X-ray crystallographic structure determination

**Table S1. Crystal data and structure refinement for 2a (CCDC 1972073)**

|                                               |                                                                              |
|-----------------------------------------------|------------------------------------------------------------------------------|
| Empirical formula                             | C <sub>20</sub> H <sub>15</sub> NO <sub>2</sub>                              |
| Formula weight                                | 301.33                                                                       |
| Temperature/K                                 | 283.36                                                                       |
| Crystal system                                | monoclinic                                                                   |
| Space group                                   | P2 <sub>1</sub> /n                                                           |
| <i>a</i> /Å                                   | 9.4255(10)                                                                   |
| <i>b</i> /Å                                   | 12.9799(13)                                                                  |
| <i>c</i> /Å                                   | 24.692(2)                                                                    |
| <i>a</i> / °                                  | 90                                                                           |
| <i>β</i> / °                                  | 92.779(3)                                                                    |
| <i>γ</i> / °                                  | 90                                                                           |
| Volume/Å <sup>3</sup>                         | 3017.3(5)                                                                    |
| <i>Z</i>                                      | 8                                                                            |
| <i>ρ</i> <sub>calc.</sub> g/cm <sup>3</sup>   | 1.327                                                                        |
| <i>μ</i> /mm <sup>-1</sup>                    | 0.086                                                                        |
| <i>F</i> (000)                                | 1264                                                                         |
| Radiation                                     | Mo K <sub>α</sub> (λ = 0.71076)                                              |
| 2θ range for data collection/°                | 4.556 to 54                                                                  |
| Index ranges                                  | -11 ≤ <i>h</i> ≤ 12, -16 ≤ <i>k</i> ≤ 16, -31 ≤ <i>l</i> ≤ 30                |
| Reflections collected                         | 44195                                                                        |
| Independent reflections                       | 6580 [ <i>R</i> <sub>int</sub> = 0.1091, <i>R</i> <sub>sigma</sub> = 0.1014] |
| Data/restraints/parameters                    | 6580/0/417                                                                   |
| Goodness-of-fit on F <sup>2</sup>             | 1.203                                                                        |
| Final R indexes [ <i>I</i> ≥ 2σ ( <i>I</i> )] | <i>R</i> <sub>1</sub> = 0.1289, <i>wR</i> <sub>2</sub> = 0.1506              |
| Final R indexes [all data]                    | <i>R</i> <sub>1</sub> = 0.2532, <i>wR</i> <sub>2</sub> = 0.1860              |
| Largest diff. peak/hole / e Å <sup>-3</sup>   | 0.19/-0.17                                                                   |

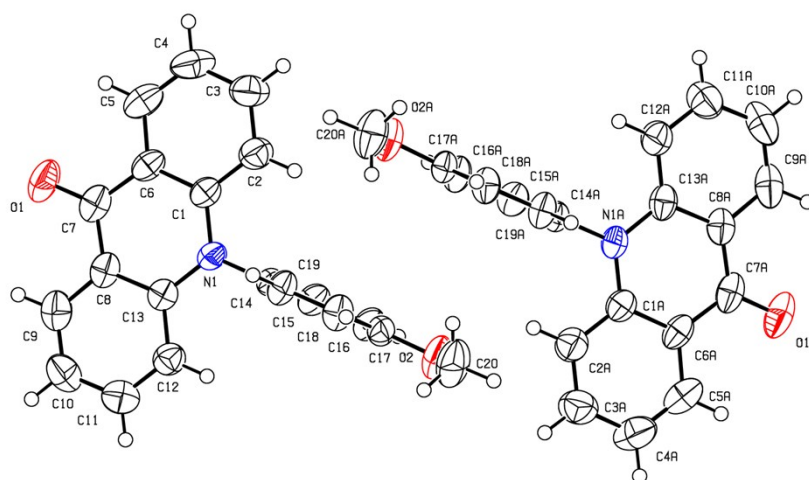

**Table S2. Crystal data and structure refinement for 2b (CCDC 1972074)**

|                                                     |                                                                              |
|-----------------------------------------------------|------------------------------------------------------------------------------|
| Empirical formula                                   | C <sub>33</sub> H <sub>26</sub> N <sub>2</sub> O <sub>3</sub>                |
| Formula weight                                      | 498.56                                                                       |
| Temperature/K                                       | 293.3                                                                        |
| Crystal system                                      | monoclinic                                                                   |
| Space group                                         | P2 <sub>1</sub> /n                                                           |
| <i>a</i> /Å                                         | 11.3406(5)                                                                   |
| <i>b</i> /Å                                         | 9.8838(5)                                                                    |
| <i>c</i> /Å                                         | 23.6490(12)                                                                  |
| $\alpha$ /°                                         | 90                                                                           |
| $\beta$ /°                                          | 100.0920(10)                                                                 |
| $\gamma$ /°                                         | 90                                                                           |
| Volume/Å <sup>3</sup>                               | 2609.8(2)                                                                    |
| <i>Z</i>                                            | 4                                                                            |
| $\rho_{\text{calc.}}$ g/cm <sup>3</sup>             | 1.269                                                                        |
| $\mu$ /mm <sup>-1</sup>                             | 0.082                                                                        |
| <i>F</i> (000)                                      | 1048.0                                                                       |
| Radiation                                           | Mo <i>K</i> <sub>α</sub> ( $\lambda$ = 0.71076)                              |
| 2 $\theta$ range for data collection/°              | 4.314 to 57.182                                                              |
| Index ranges                                        | -15 ≤ <i>h</i> ≤ 15, -13 ≤ <i>k</i> ≤ 13, -30 ≤ <i>l</i> ≤ 31                |
| Reflections collected                               | 42064                                                                        |
| Independent reflections                             | 6642 [ <i>R</i> <sub>int</sub> = 0.0706, <i>R</i> <sub>sigma</sub> = 0.0782] |
| Data/restraints/parameters                          | 6642/0/345                                                                   |
| Goodness-of-fit on <i>F</i> <sup>2</sup>            | 1.024                                                                        |
| Final <i>R</i> indexes [ <i>I</i> ≥ 2σ( <i>I</i> )] | <i>R</i> <sub>1</sub> = 0.0748, <i>wR</i> <sub>2</sub> = 0.1239              |
| Final <i>R</i> indexes [all data]                   | <i>R</i> <sub>1</sub> = 0.1695, <i>wR</i> <sub>2</sub> = 0.1516              |
| Largest diff. peak/hole / e Å <sup>-3</sup>         | 0.21/-0.20                                                                   |

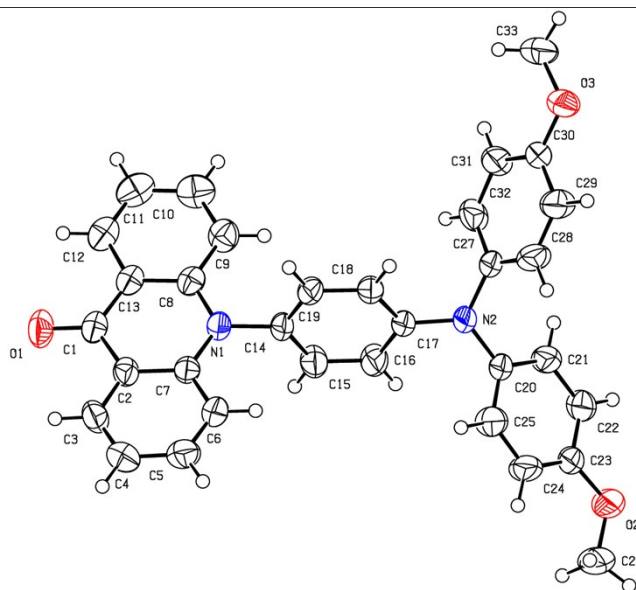

**Table S3. Crystal data and structure refinement for 2c (CCDC 1972075)**

|                                                     |                                                                              |
|-----------------------------------------------------|------------------------------------------------------------------------------|
| Empirical formula                                   | C <sub>39</sub> H <sub>30</sub> N <sub>2</sub> O <sub>3</sub>                |
| Formula weight                                      | 574.68                                                                       |
| Temperature/K                                       | 293.3                                                                        |
| Crystal system                                      | triclinic                                                                    |
| Space group                                         | P $\bar{1}$                                                                  |
| <i>a</i> /Å                                         | 9.8465(8)                                                                    |
| <i>b</i> /Å                                         | 12.7204(10)                                                                  |
| <i>c</i> /Å                                         | 13.4275(10)                                                                  |
| $\alpha$ /°                                         | 69.672(2)                                                                    |
| $\beta$ /°                                          | 71.642(2)                                                                    |
| $\gamma$ /°                                         | 77.107(2)                                                                    |
| Volume/Å <sup>3</sup>                               | 1484.5(2)                                                                    |
| <i>Z</i>                                            | 2                                                                            |
| $\rho_{\text{calc.}}$ g/cm <sup>3</sup>             | 1.281                                                                        |
| $\mu$ /mm <sup>-1</sup>                             | 0.078                                                                        |
| <i>F</i> (000)                                      | 604.0                                                                        |
| Radiation                                           | Mo <i>K</i> <sub>α</sub> ( $\lambda$ = 0.71076)                              |
| $2\theta$ range for data collection/°               | 4.394 to 52.896                                                              |
| Index ranges                                        | -12 ≤ <i>h</i> ≤ 12, -15 ≤ <i>k</i> ≤ 15, -16 ≤ <i>l</i> ≤ 16                |
| Reflections collected                               | 35328                                                                        |
| Independent reflections                             | 6114 [ <i>R</i> <sub>int</sub> = 0.0989, <i>R</i> <sub>sigma</sub> = 0.1094] |
| Data/restraints/parameters                          | 6114/0/399                                                                   |
| Goodness-of-fit on <i>F</i> <sup>2</sup>            | 1.060                                                                        |
| Final <i>R</i> indexes [ <i>I</i> ≥ 2σ( <i>I</i> )] | <i>R</i> <sub>1</sub> = 0.0852, <i>wR</i> <sub>2</sub> = 0.1120              |
| Final <i>R</i> indexes [all data]                   | <i>R</i> <sub>1</sub> = 0.1916, <i>wR</i> <sub>2</sub> = 0.1365              |
| Largest diff. peak/hole / e Å <sup>-3</sup>         | 0.19/-0.18                                                                   |

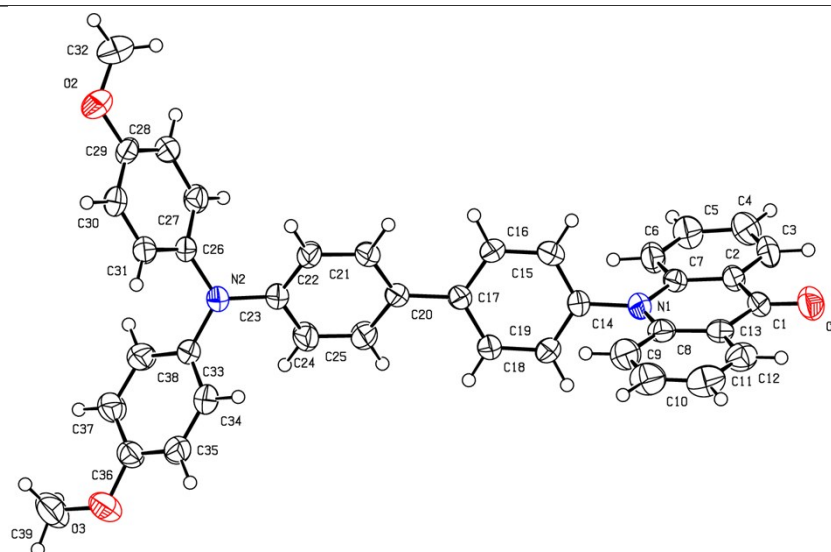

## 4. NMR Spectra

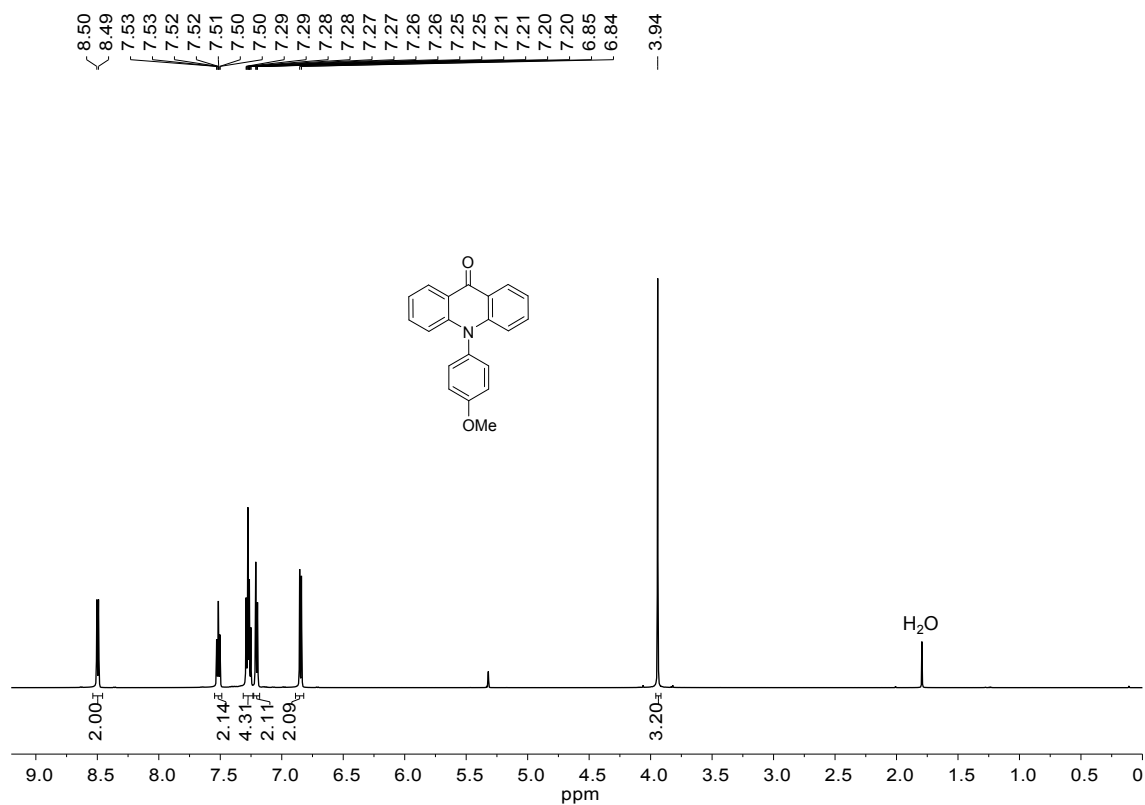

Figure S1.  $^1\text{H}$  NMR spectrum (CD<sub>2</sub>Cl<sub>2</sub>, 600 MHz) of 2a.

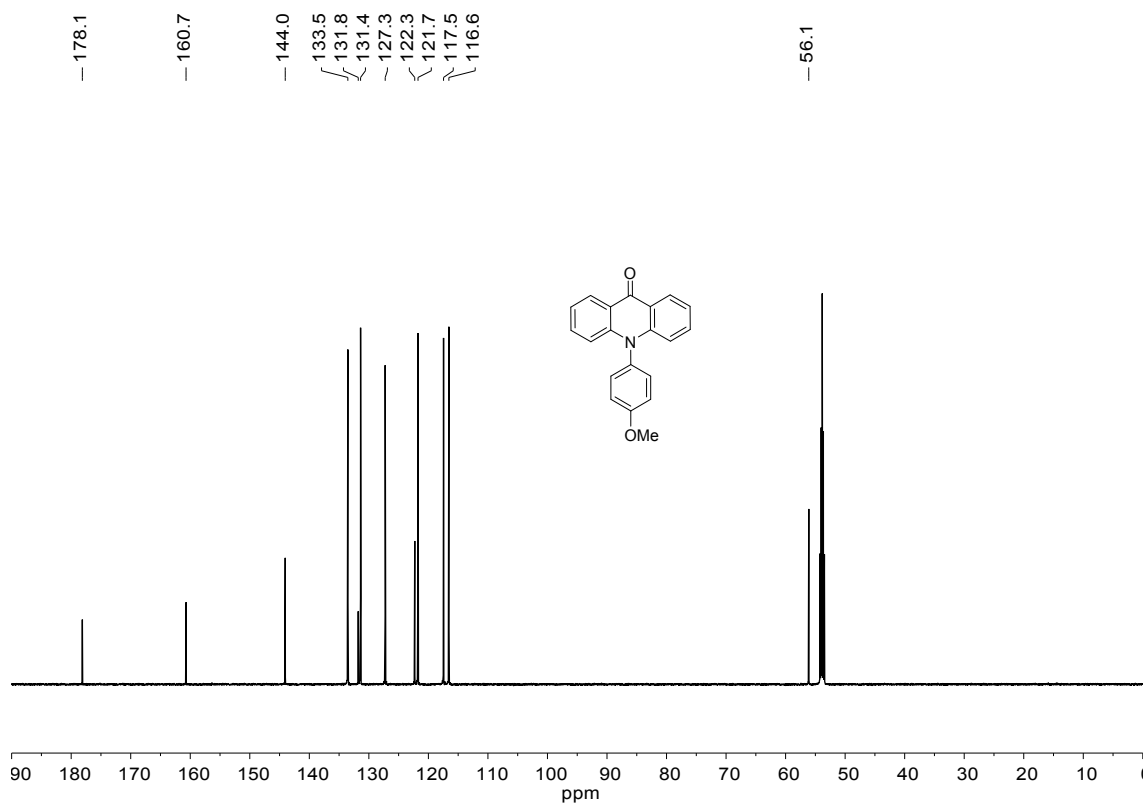

Figure S2.  $^{13}\text{C}$  NMR spectrum (CD<sub>2</sub>Cl<sub>2</sub>, 150 MHz) of 2a.

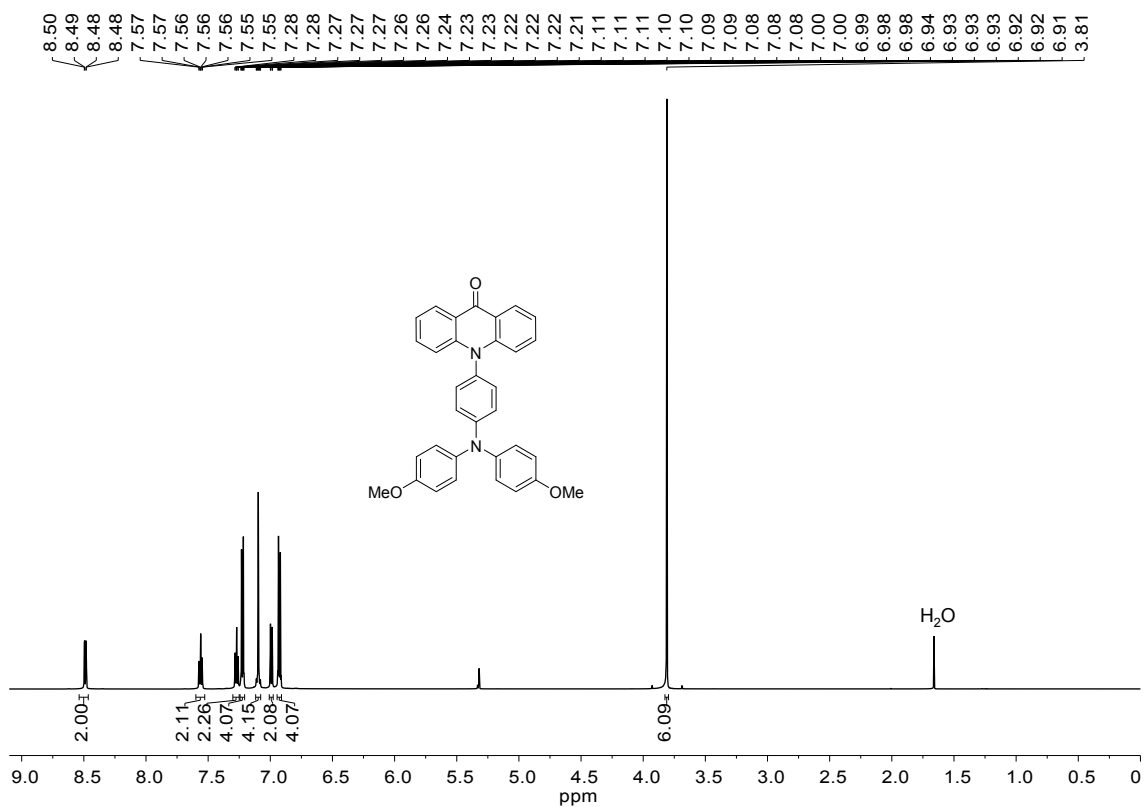

Figure S3. <sup>1</sup>H NMR spectrum (CD<sub>2</sub>Cl<sub>2</sub>, 600 MHz) of **2b**.

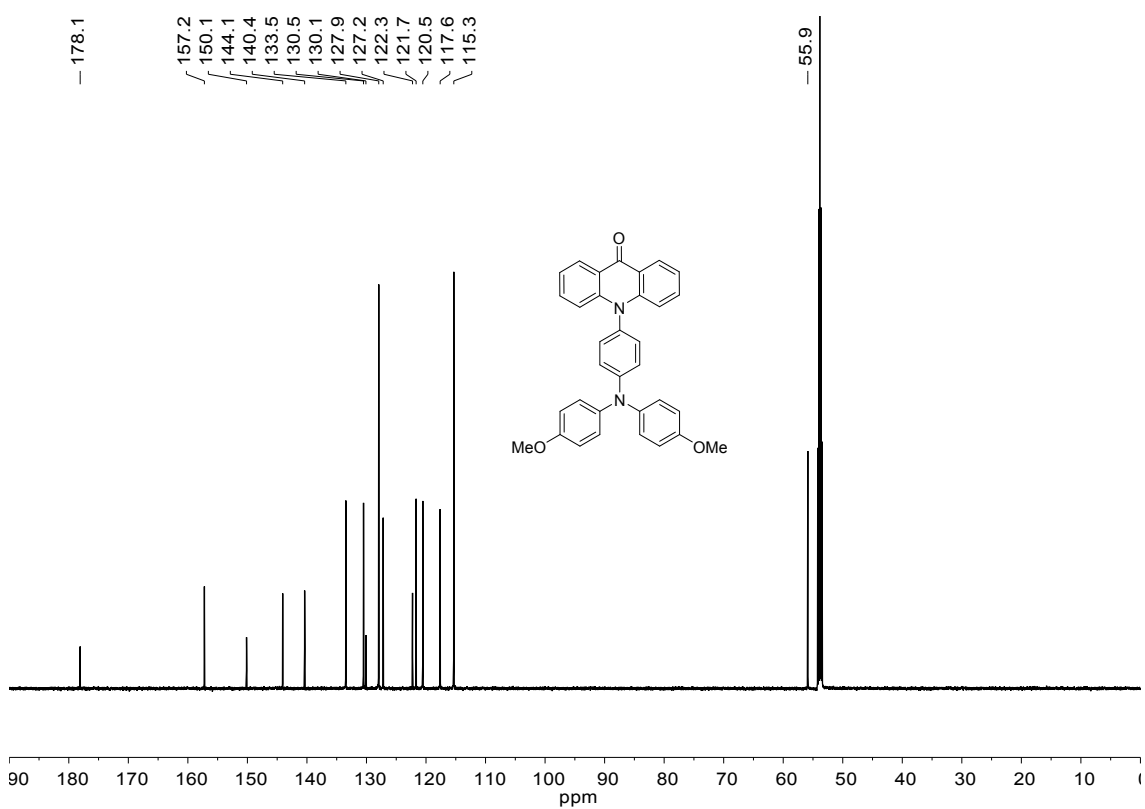

Figure S4. <sup>13</sup>C NMR spectrum (CD<sub>2</sub>Cl<sub>2</sub>, 150 MHz) of **2b**.



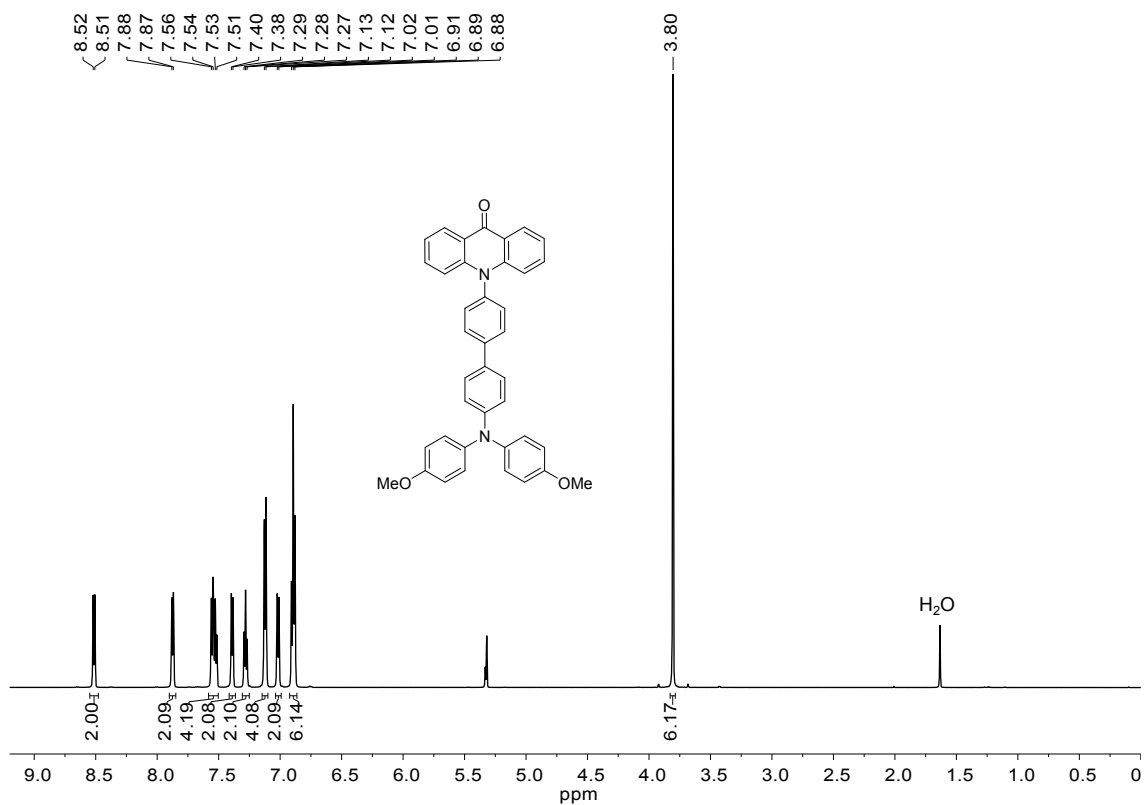

**Figure S5.**  $^1\text{H}$  NMR spectrum ( $\text{CD}_2\text{Cl}_2$ , 600 MHz) of **2c**.

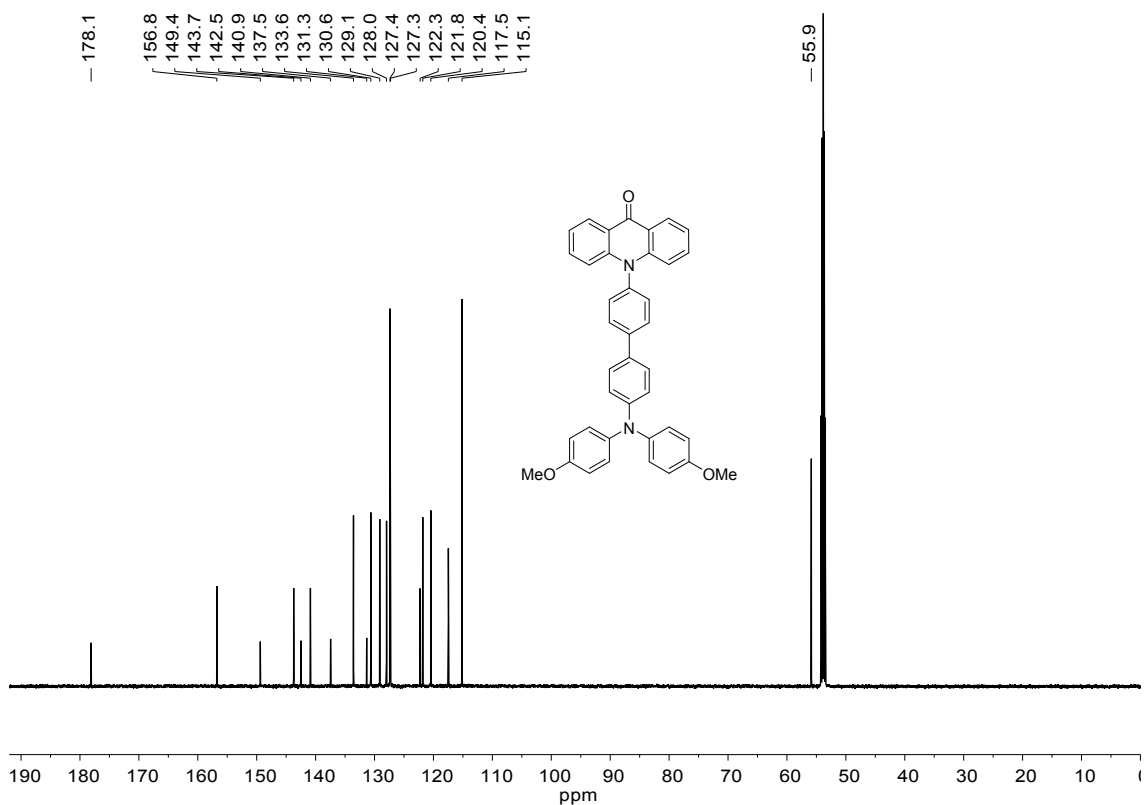

**Figure S6.**  $^{13}\text{C}$  NMR spectrum ( $\text{CD}_2\text{Cl}_2$ , 150 MHz) of **2c**.

## 5. UV/vis and fluorescence spectra

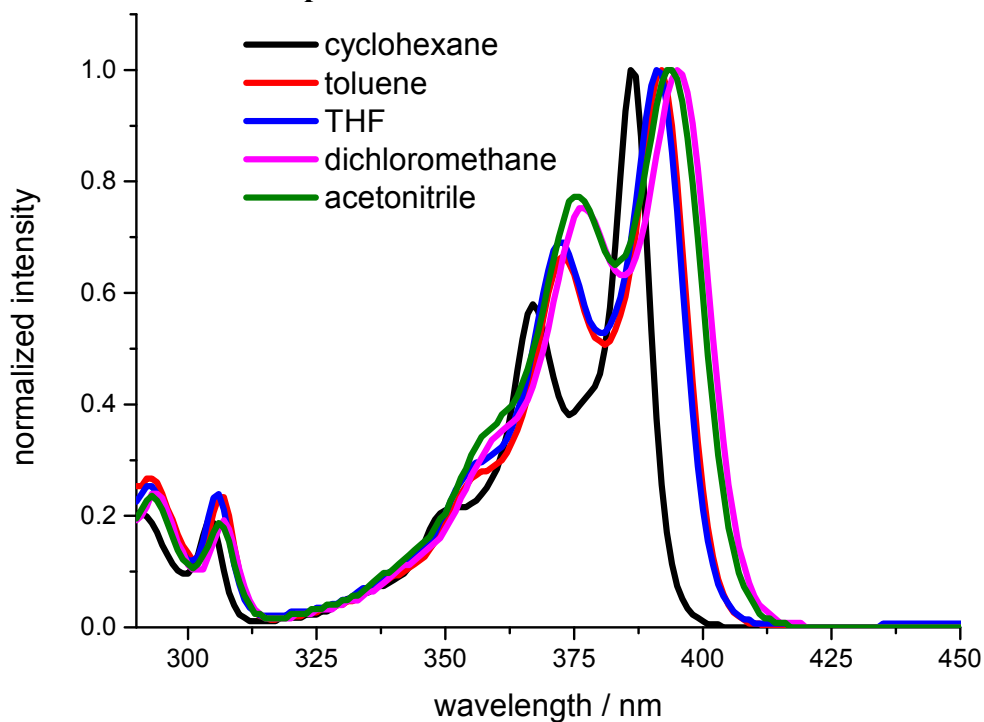

**Figure S7.** UV/vis absorption spectra of compound **2a** measured in different solvents at room temperature.

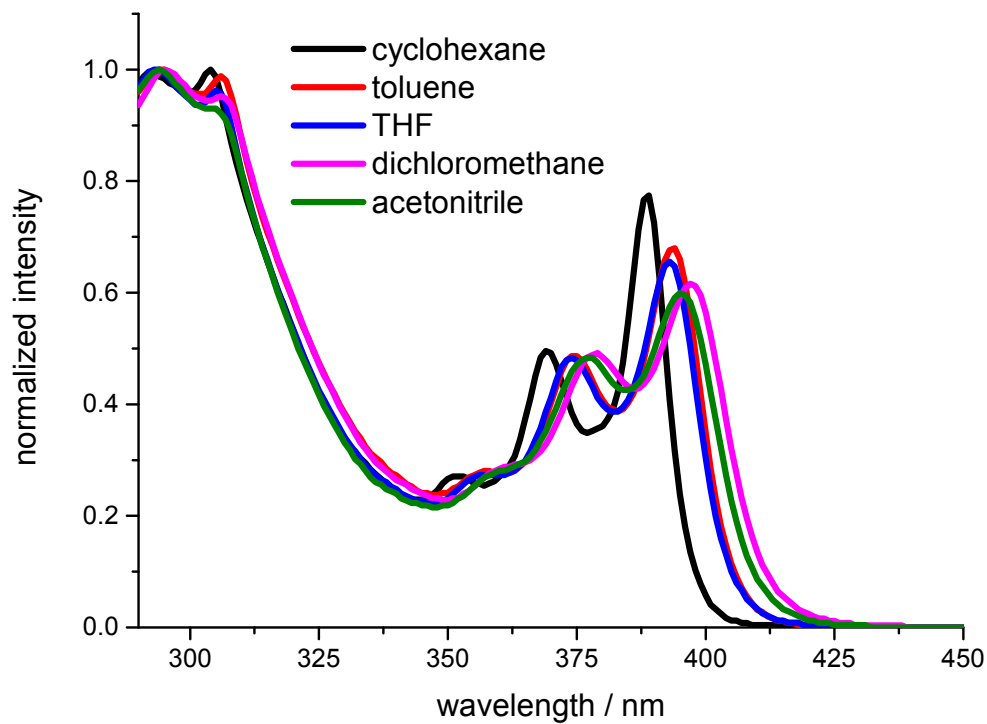

**Figure S8.** UV/vis absorption spectra of compound **2b** measured in different solvents at room temperature.

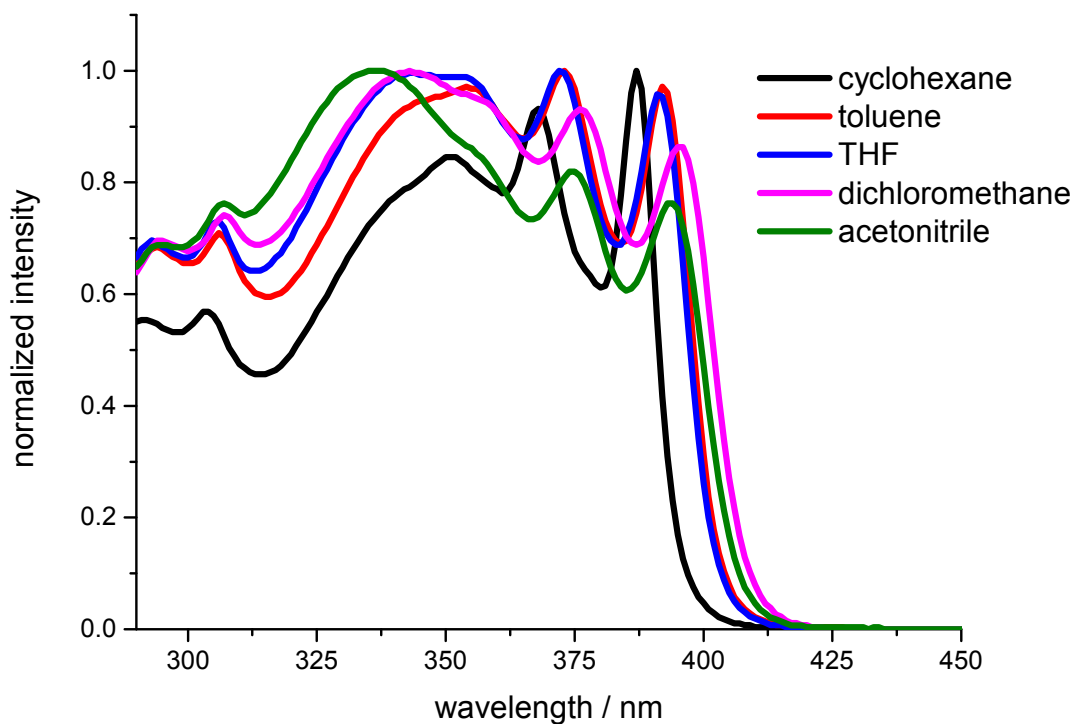

**Figure S9.** UV/vis absorption spectra of compound **2c** measured in different solvents at room temperature.

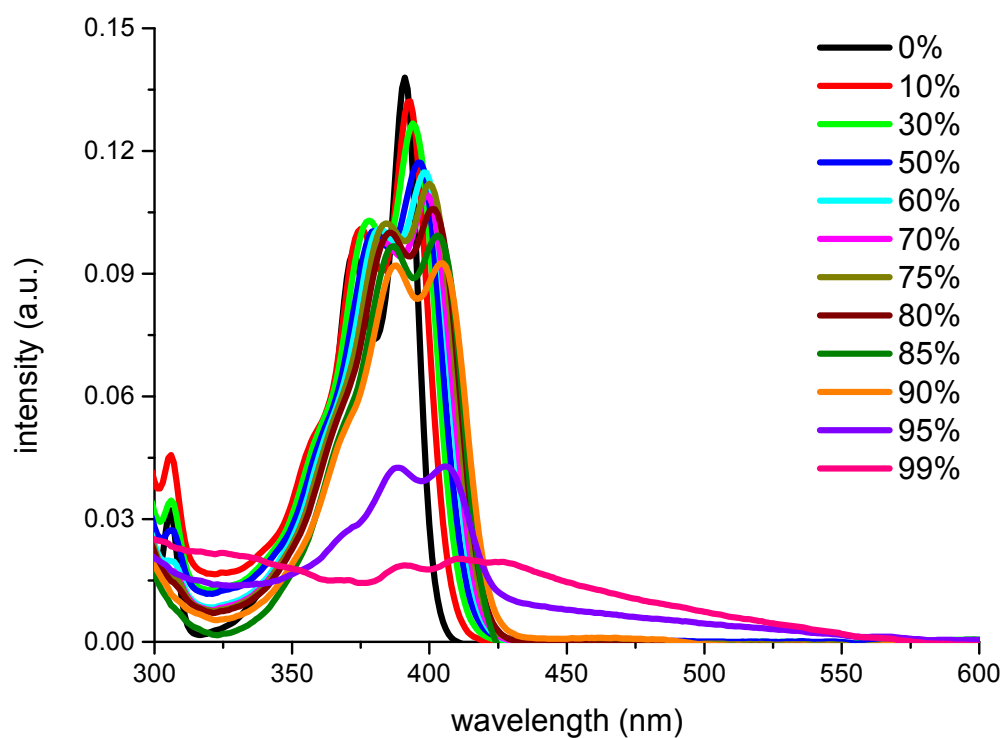

**Figure S10.** UV/vis absorption spectra of compound **2a** measured in THF/water with different water fractions at room temperature, concentration: 10  $\mu$ M.

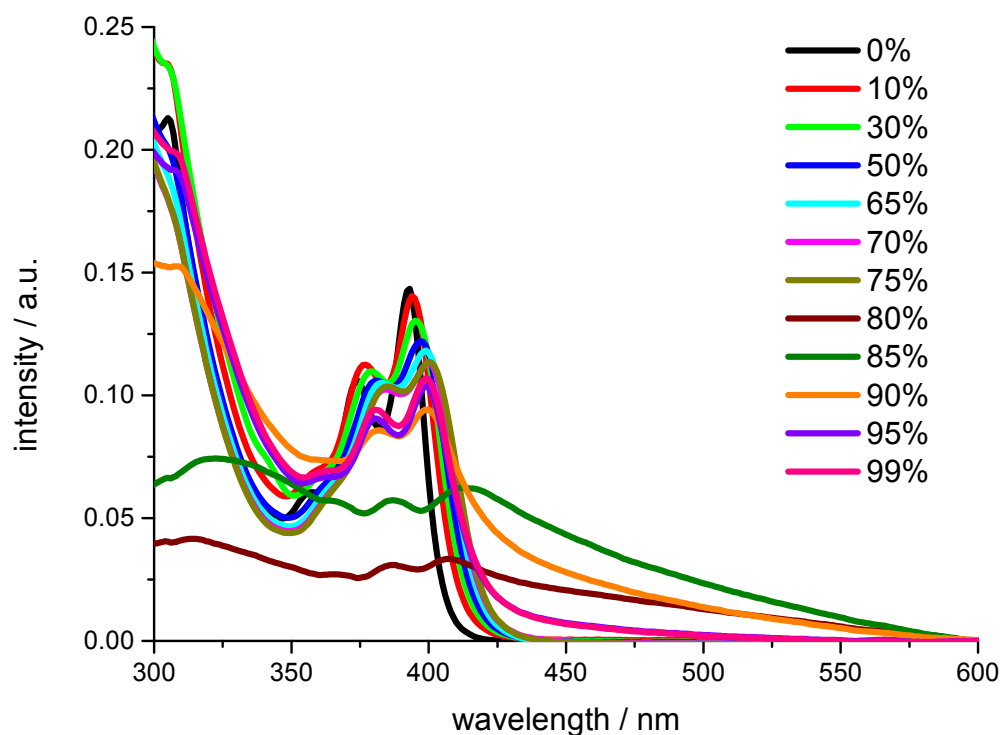

**Figure S11.** UV/vis absorption spectra of compound **2b** measured in THF/water with different water fractions at room temperature, concentration: 10  $\mu\text{M}$ .

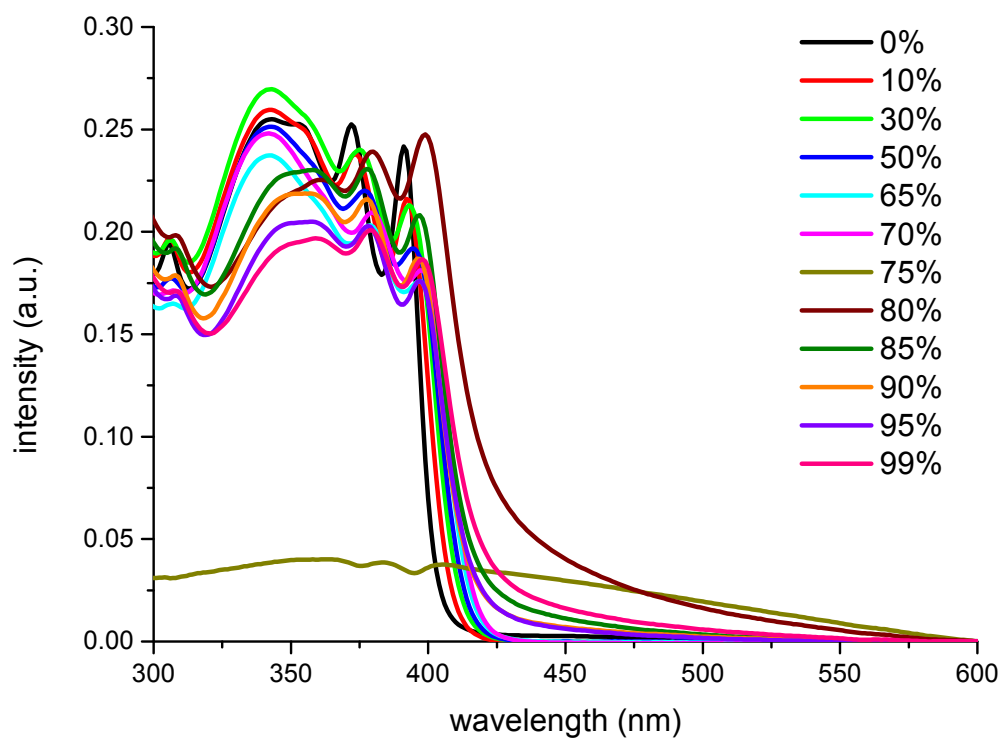

**Figure S12.** UV/vis absorption spectra of compound **2c** measured in THF/water with different water fractions at room temperature, concentration: 10  $\mu\text{M}$ .

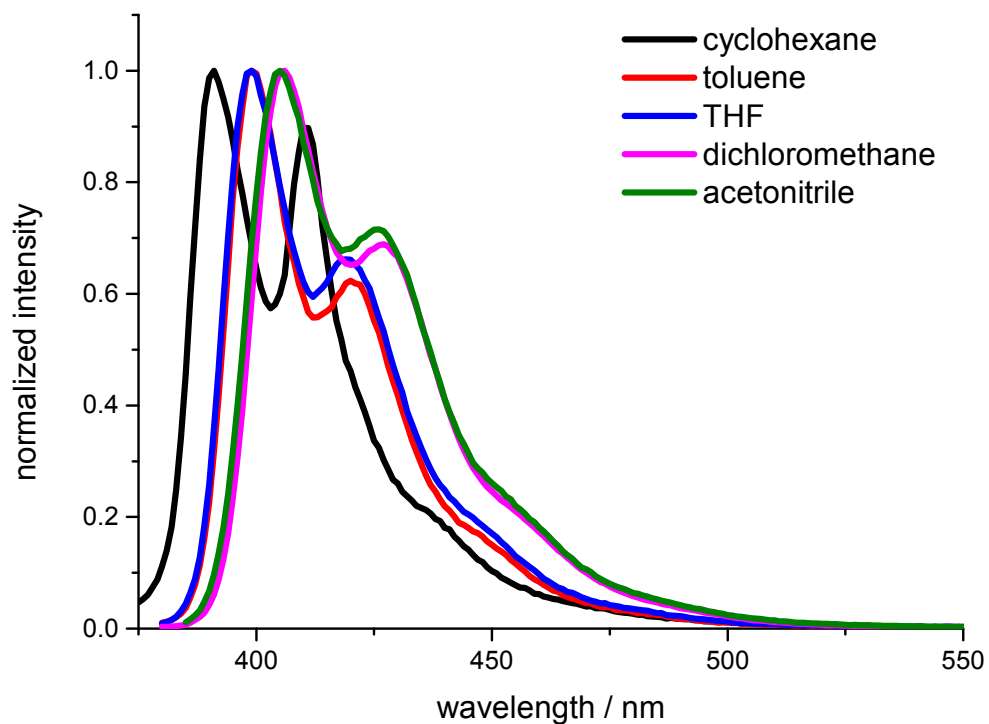

**Figure S13.** Fluorescence spectra of compound **2a** measured in different solvents at room temperature, concentration: 10  $\mu$ M.

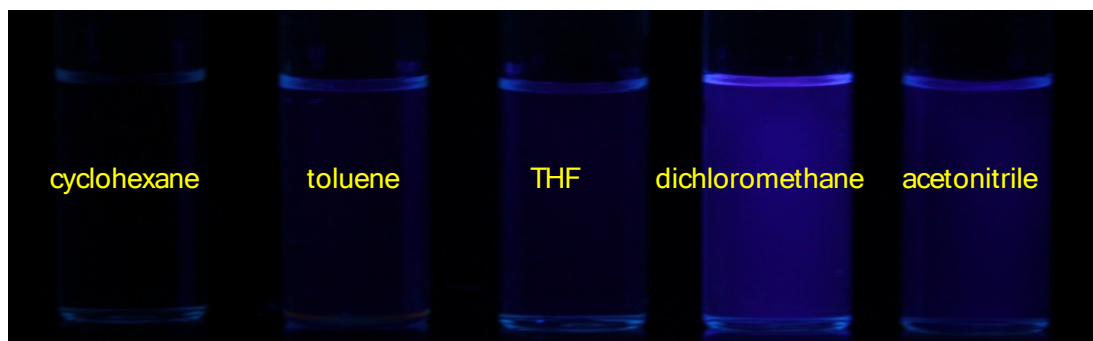

**Figure S14.** Photographs of compound **2a** in different solvents under 365 nm UV light, concentration: 10  $\mu$ M.

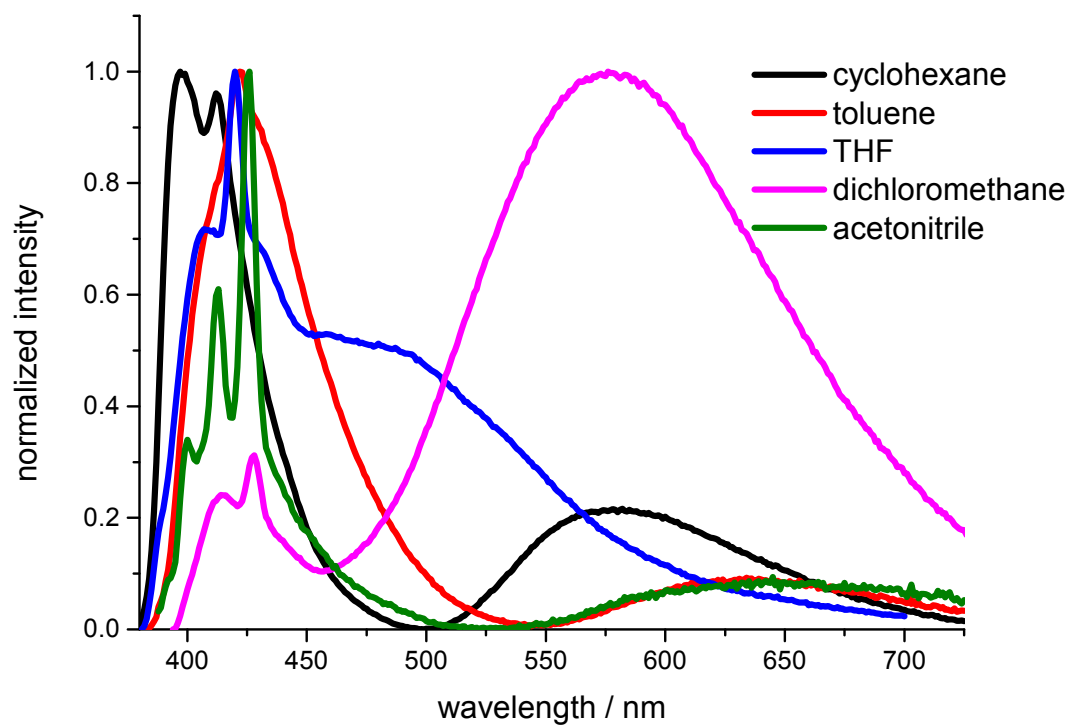

**Figure S15.** Fluorescence spectra of compound **2b** measured in different solvents at room temperature, concentration: 10  $\mu\text{M}$ .

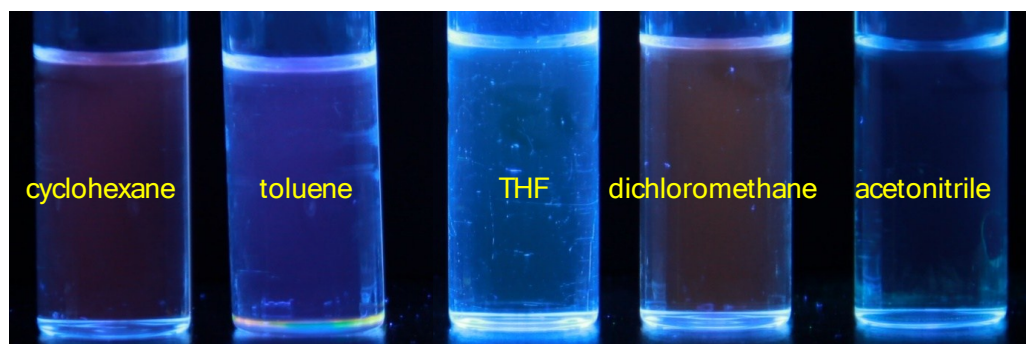

**Figure S16.** Photographs of compound **2b** in different solvents under 365 nm UV light, concentration: 10  $\mu\text{M}$ .

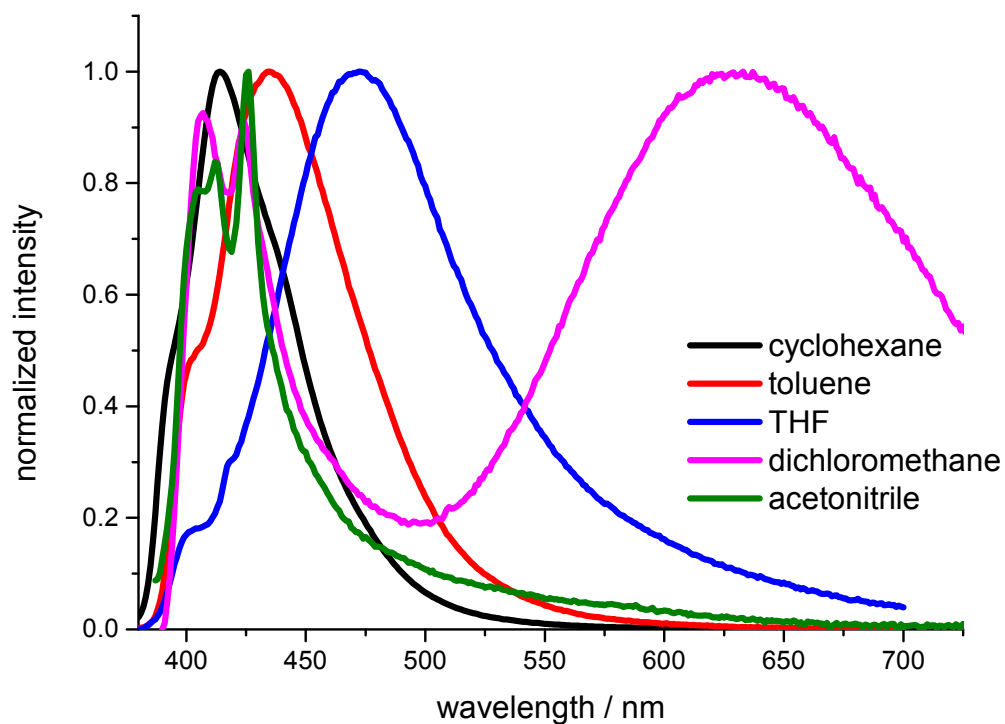

**Figure S17.** Fluorescence spectra of compound **2c** measured in different solvents at room temperature, concentration: 10  $\mu\text{M}$ .

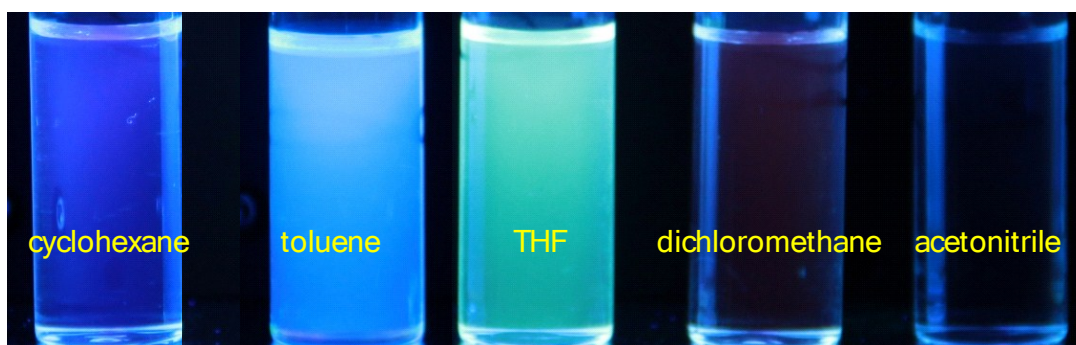

**Figure S18.** Photographs of compound **2c** in different solvents under 365 nm UV light, concentration: 10  $\mu\text{M}$ .

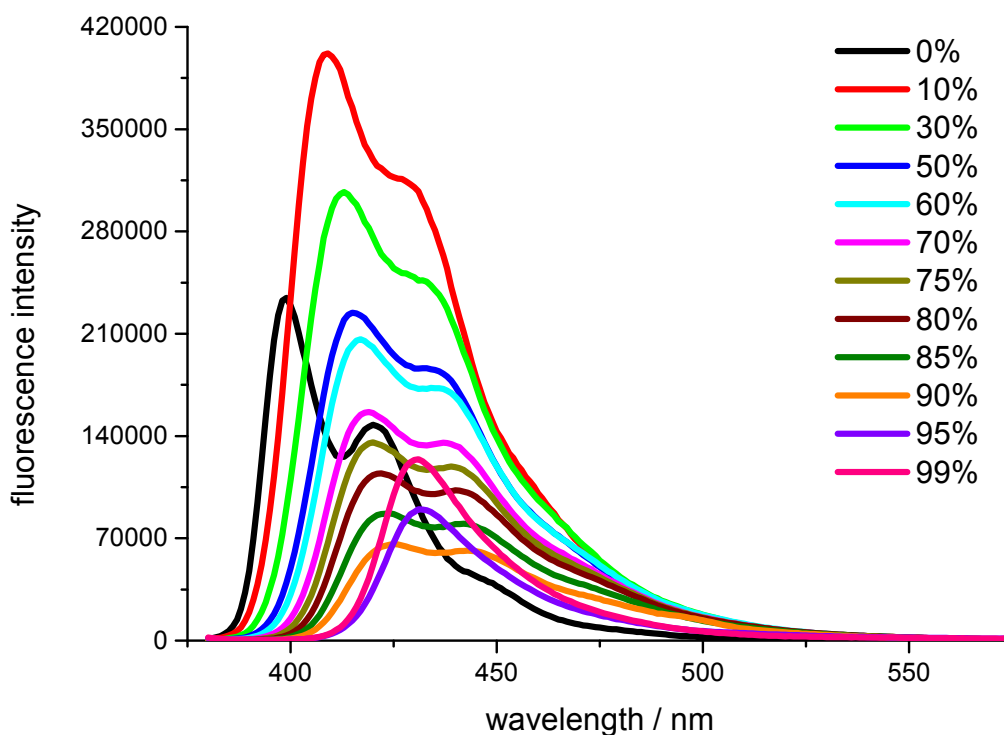

**Figure S19.** Fluorescence emission spectra of compound **2a** measured in THF/water with different water fractions at room temperature, concentration: 10  $\mu$ M.

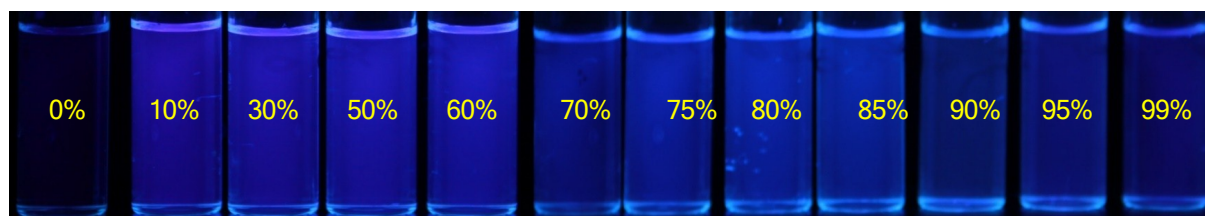

**Figure S20.** Photographs of compound **2a** in THF/water with different water fractions under 365 nm UV light, concentration: 10  $\mu$ M.

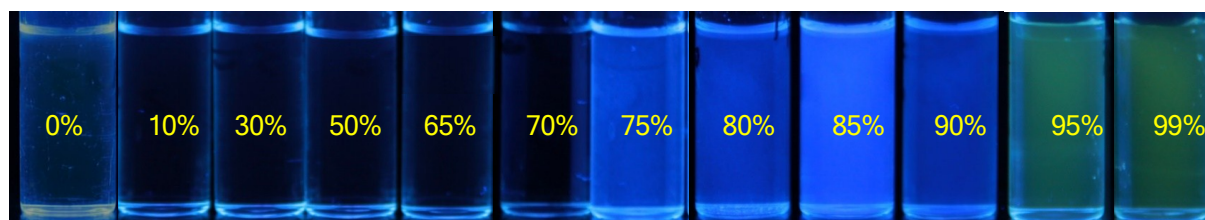

**Figure S21.** Photographs of compound **2b** in THF/water with different water fractions under 365 nm UV light, concentration: 10  $\mu$ M.



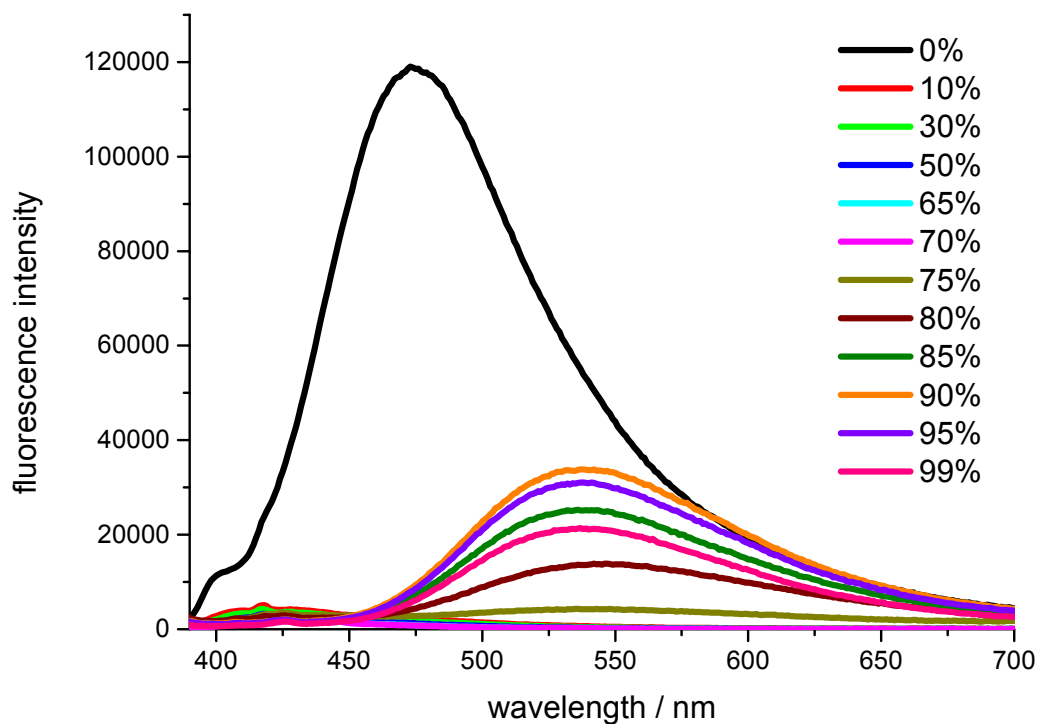

**Figure S22.** Fluorescence emission spectra of compound **2c** measured in THF/water with different water fractions at room temperature, concentration: 10  $\mu\text{M}$ .

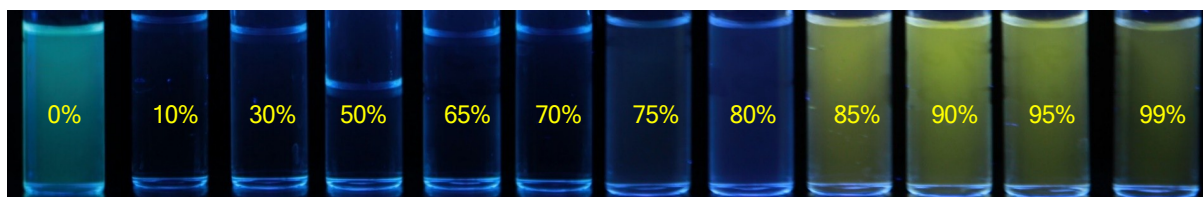

**Figure S23.** Photographs of compound **2c** in THF/water with different water fractions under 365 nm UV light, concentration: 10  $\mu\text{M}$ .

**Table S4** Summary of photoluminescence of **2a-2c** in different solvents at the concentration of 10  $\mu\text{M}$ .

|           |                   | LE                                  |                 |                |                                           |                                              | ICT                    |                 |                |                                           |                                              |
|-----------|-------------------|-------------------------------------|-----------------|----------------|-------------------------------------------|----------------------------------------------|------------------------|-----------------|----------------|-------------------------------------------|----------------------------------------------|
| compd.    | sol.              | $\lambda_{em}/\lambda_{ex}$<br>(nm) | $\Phi_F$<br>(%) | $\tau$<br>(ns) | $k_r$<br>( $\times 10^7 \text{ s}^{-1}$ ) | $k_{nr}$<br>( $\times 10^7 \text{ s}^{-1}$ ) | $\lambda_{em}$<br>(nm) | $\Phi_F$<br>(%) | $\tau$<br>(ns) | $k_r$<br>( $\times 10^7 \text{ s}^{-1}$ ) | $k_{nr}$<br>( $\times 10^7 \text{ s}^{-1}$ ) |
| <b>2a</b> | CHX               | 391/367                             | 4.4             | 0.014          | 326                                       | 7080                                         | -                      | -               | -              | -                                         | -                                            |
|           | TOL               | 399/373                             | 8.2             | 0.013          | 656                                       | 7340                                         | -                      | -               | -              | -                                         | -                                            |
|           | THF               | 399/372                             | 10              | 1.1            | 9.1                                       | 82                                           | -                      | -               | -              | -                                         | -                                            |
|           | DCM               | 406/377                             | 35              | 1.8            | 19                                        | 36                                           | -                      | -               | -              | -                                         | -                                            |
|           | MeCN              | 405/375                             | 23              | 2.0            | 11                                        | 38                                           | -                      | -               | -              | -                                         | -                                            |
| <b>2b</b> | CHX               | 397/369                             | 2.7             | 0.021          | 1270                                      | 45900                                        | 578                    | 2.2             | 0.84           | 2.6                                       | 116                                          |
|           | TOL               | 422/374                             | 3.6             | 4.6            | 0.8                                       | 21                                           | 636                    | 1.3             | 0.021          | 61                                        | 4700                                         |
|           | THF               | 420/374                             | 1.6             | 5.6            | 0.3                                       | 18                                           | 480                    | 1.9             | 1.7            | 1.1                                       | 58                                           |
|           | DCM               | 426/379                             | 1.7             | 3.9            | 0.4                                       | 25                                           | 571                    | 3.3             | 0.69           | 4.8                                       | 140                                          |
|           | MeCN              | 426/378                             | 3.8             | 3.7            | 1.0                                       | 26                                           | 652                    | 1.4             | 1.5            | 0.9                                       | 66                                           |
| <b>2c</b> | CHX <sup>a</sup>  | 414/368                             | 3.5             | 0.011          | 320                                       | 8770                                         | -                      | -               | -              | -                                         | -                                            |
|           | TOL <sup>a</sup>  | 435/373                             | 32              | 2.3            | 14                                        | 29                                           | -                      | -               | -              | -                                         | -                                            |
|           | THF <sup>a</sup>  | 473/372                             | 10              | 2.9            | 3.4                                       | 31                                           | -                      | -               | -              | -                                         | -                                            |
|           | DCM               | 407/376                             | 1.7             | 4.7            | 0.4                                       | 21                                           | 627                    | 1.2             | 4.4            | 0.3                                       | 22                                           |
|           | MeCN <sup>b</sup> | 426/378                             | 3.8             | 4.3            | 0.9                                       | 22                                           | -                      | -               | -              | -                                         | -                                            |

<sup>a</sup> The fluorescence at the ICT and LE state are overlapped, thus only the peaks at the emission maxima are listed. <sup>b</sup>No fluorescence at the ICT state was observed. CHX: cyclohexane; TOL: toluene; THF: tetrahydrofuran; DCM: dichloromethane; MeCN: acetonitrile.

**Table S5** Summary of photoluminescence of **2a-2c** in solid state

| compd     | $\lambda_{em}/\lambda_{ex}$<br>(nm) | $\Phi_F$<br>(%) | $\tau$<br>(ns) | $k_r$<br>( $\times 10^7 \text{ s}^{-1}$ ) | $k_{nr}$<br>( $\times 10^7 \text{ s}^{-1}$ ) |
|-----------|-------------------------------------|-----------------|----------------|-------------------------------------------|----------------------------------------------|
| <b>2a</b> | 464/365                             | 13              | 3.9            | 3.3                                       | 22.3                                         |
| <b>2b</b> | 457/365                             | 17              | 3.2            | 5.3                                       | 25.9                                         |
| <b>2c</b> | 496/365 <sup>a</sup>                | 2.1             | 37.9           | 0.06                                      | 2.6                                          |

<sup>a</sup> The fluorescence of **2c** has a broad emission in the range 458-504 nm, thus only the peak with the highest intensity is listed.

**Table S6** Summary of photoluminescence of **2a-2c** in THF/water at the concentration of 10  $\mu\text{M}$  in solution and aggregation states.

| compd     | water content  | $\lambda_{em}/\lambda_{ex}$<br>(nm) | $\Phi_F$<br>(%) | $\tau$<br>(ns) | $k_r$<br>( $\times 10^7 \text{ s}^{-1}$ ) | $k_{nr}$<br>( $\times 10^7 \text{ s}^{-1}$ ) |
|-----------|----------------|-------------------------------------|-----------------|----------------|-------------------------------------------|----------------------------------------------|
| <b>2a</b> | 0              | 399/372                             | 10              | 1.1            | 9.1                                       | 81.8                                         |
|           | 0.99           | 431/372                             | 7.3             | 1.3            | 5.7                                       | 72.4                                         |
| <b>2b</b> | 0 <sup>a</sup> | 420/374                             | 1.6             | 5.6            | 0.3                                       | 17.6                                         |
|           | 0.85           | 433/374                             | 21              | 3.4            | 6.1                                       | 23.1                                         |
|           | 0.95           | 525/374                             | 1.9             | 89             | 0.02                                      | 1.1                                          |
| <b>2c</b> | 0 <sup>b</sup> | 473/372                             | 10              | 2.9            | 3.4                                       | 31                                           |
|           | 0.9            | 538/372                             | 1.5             | 31.5           | 0.05                                      | 3.1                                          |

<sup>a</sup> Only the fluorescence of the LE state is listed. <sup>b</sup> The fluorescence at the ICT and LE state are overlapped, thus only the peaks at the emission maxima are listed.

## 6. CV spectra

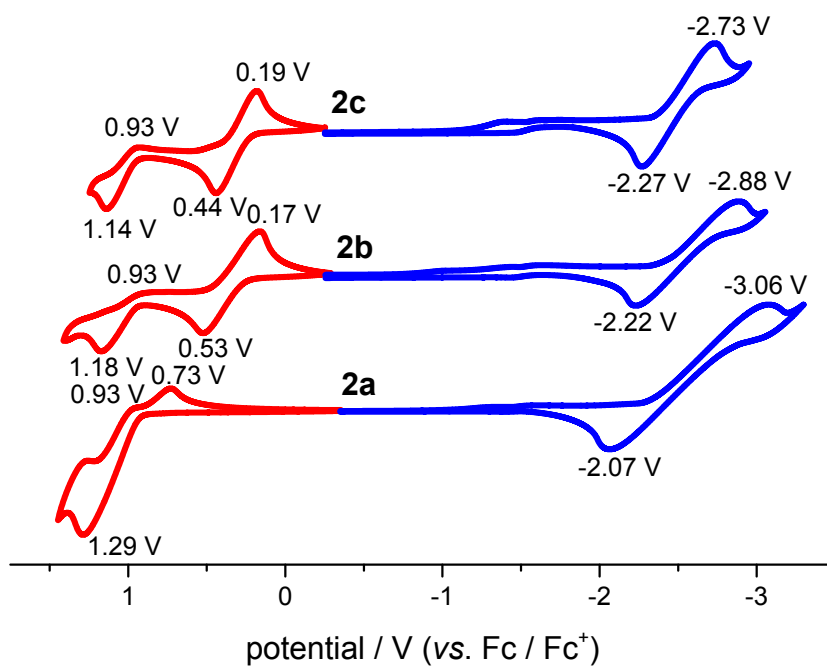

**Figure S24.** Cyclic voltammograms of compound **2a-2c** measured in 0.1 M Bu<sub>4</sub>NClO<sub>4</sub> in dichloromethane for oxidation and in THF for reduction at room temperature. The scan speed was 100 mV/s, and ferrocene/ferrocenium (Fc/Fc<sup>+</sup>) was used as internal reference.

## 7. Particle size distribution

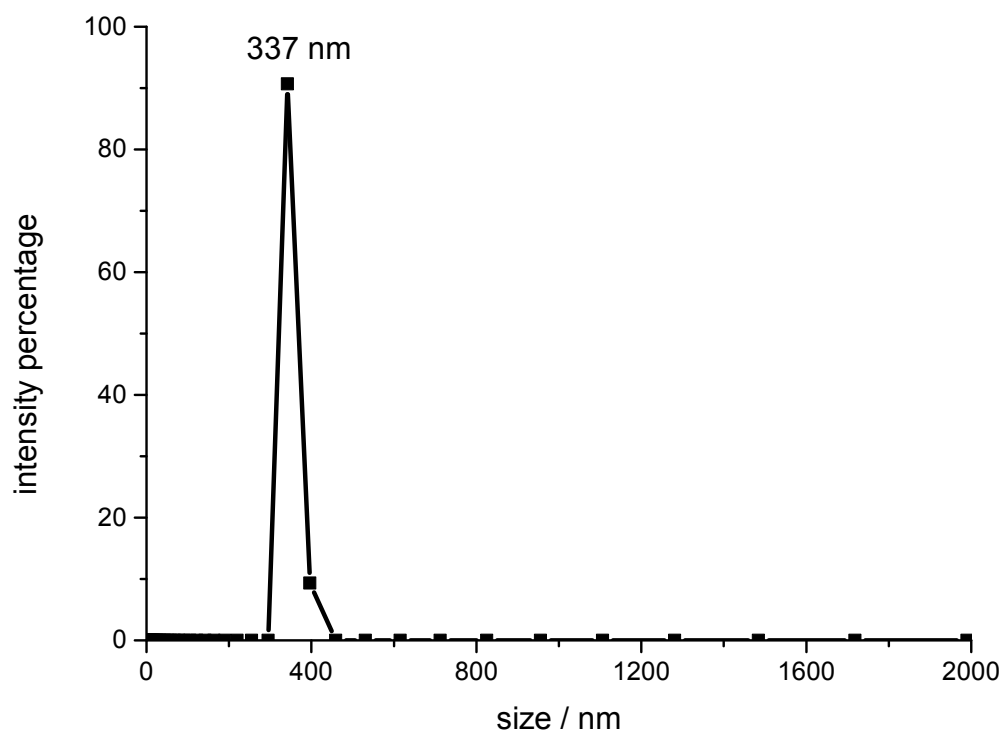

**Figure S25.** Particle size distribution of compound **2a** in 99% water in THF, concentration: 10  $\mu$ M.

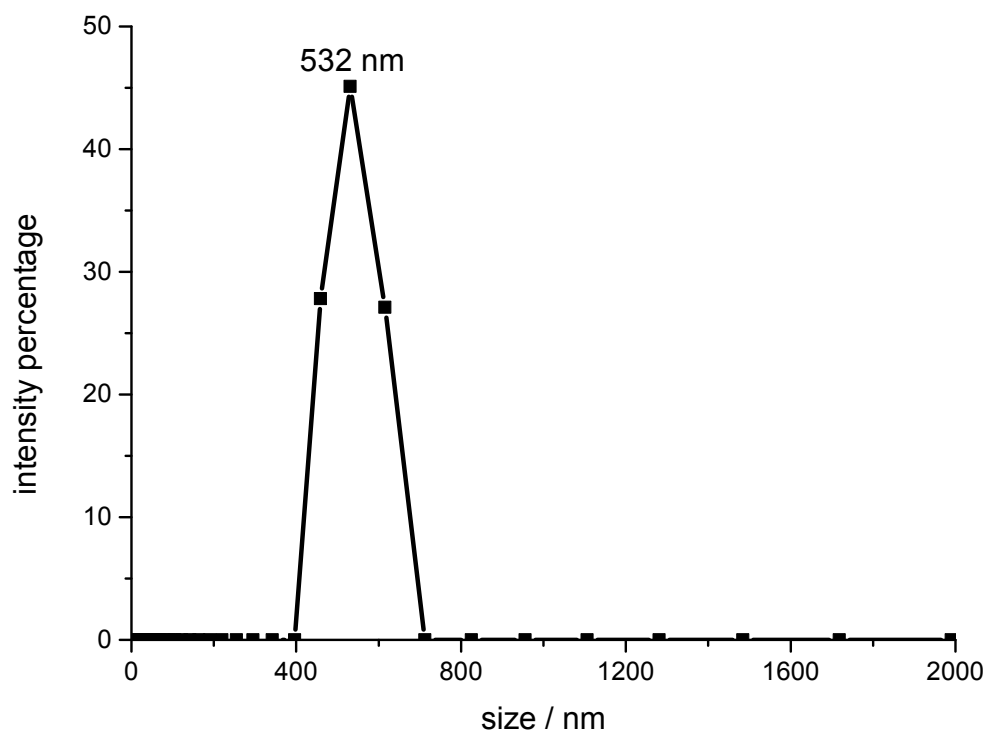

**Figure S26.** Particle size distribution of compound **2b** in 85% water in THF, concentration: 10  $\mu$ M.

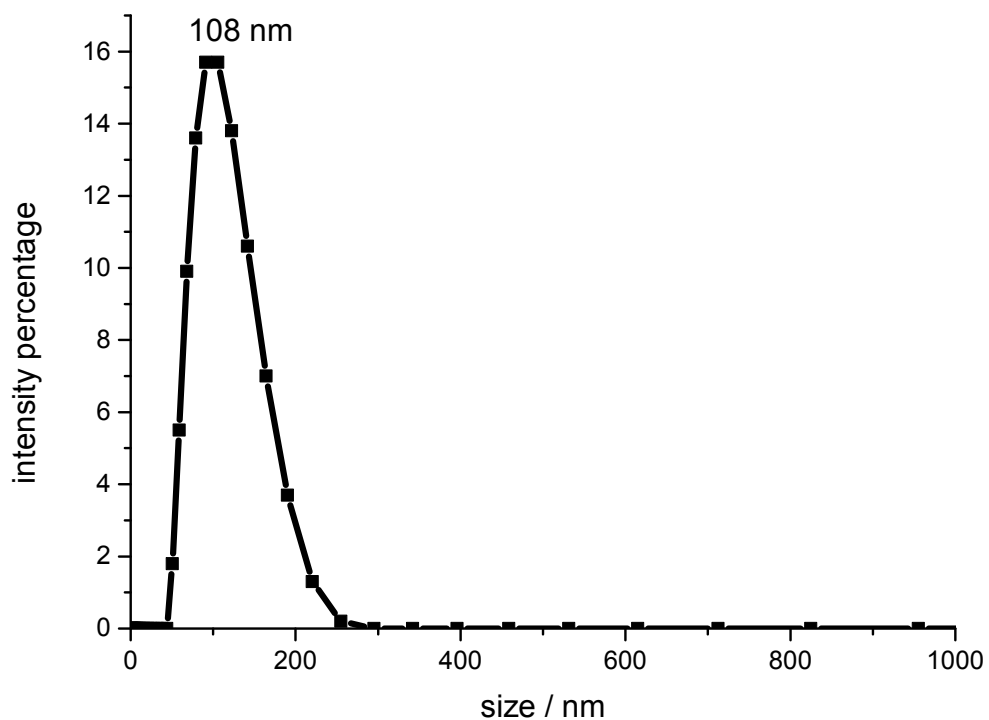

**Figure S27.** Particle size distribution of compound **2b** in 95% water in THF, concentration: 10  $\mu$ M.

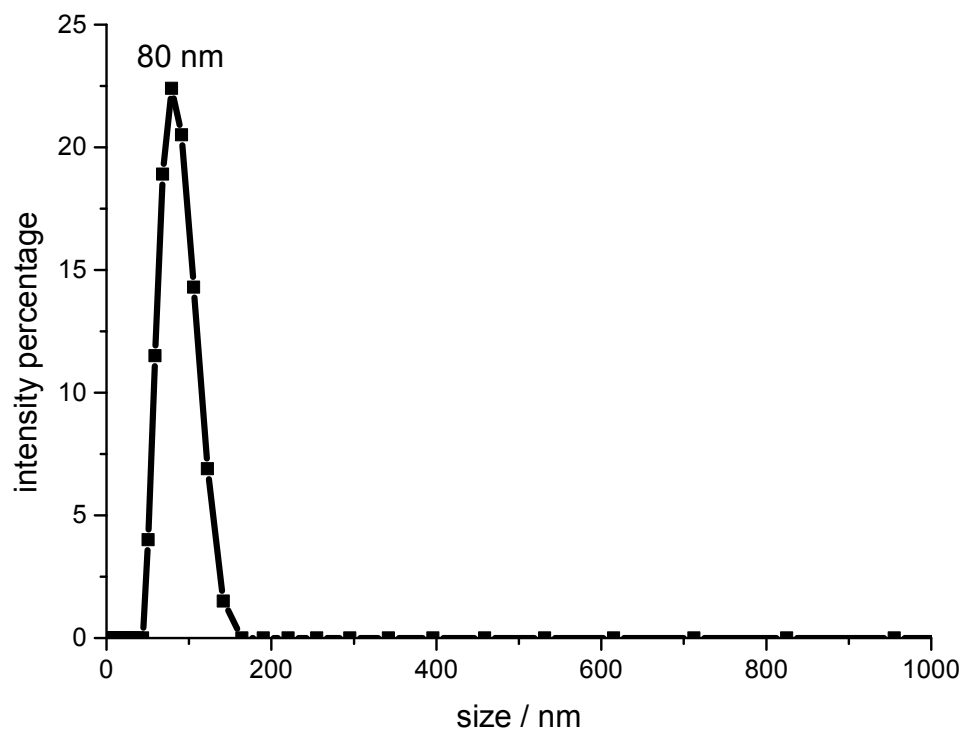

**Figure S28.** Particle size distribution of compound **2c** in 90% water in THF, concentration: 10  $\mu$ M.

## 8. Calculations

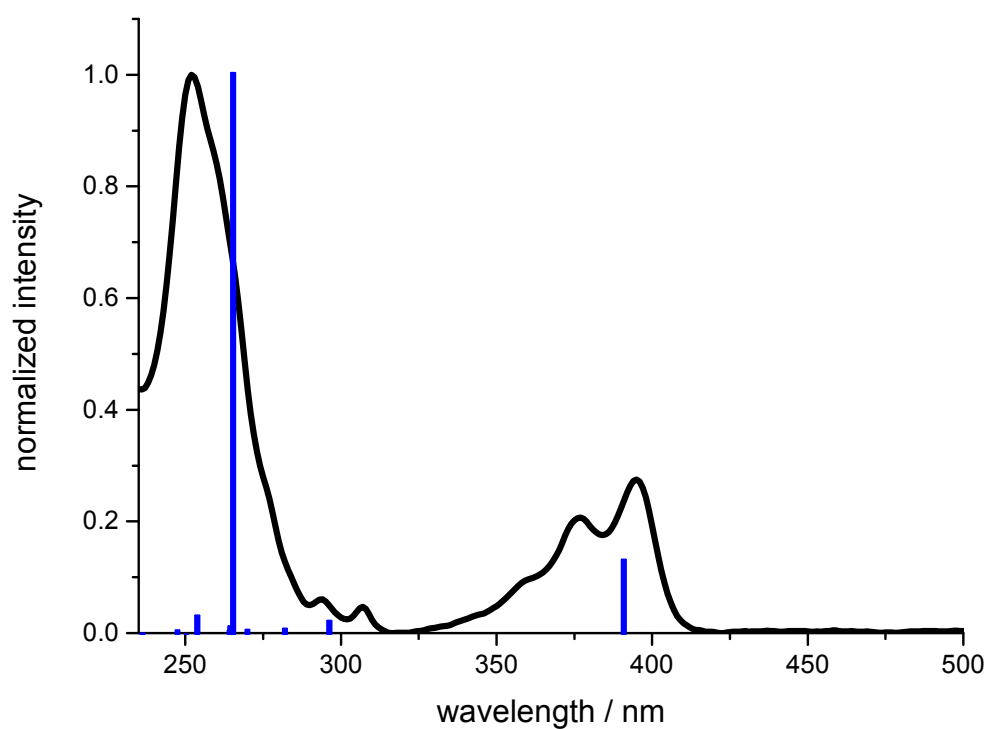

**Figure S29.** UV/Vis absorption spectrum of **2a** and TD-DFT calculated oscillator strength (blue column) in dichloromethane at APFD/6-311G+(2d,p) level.

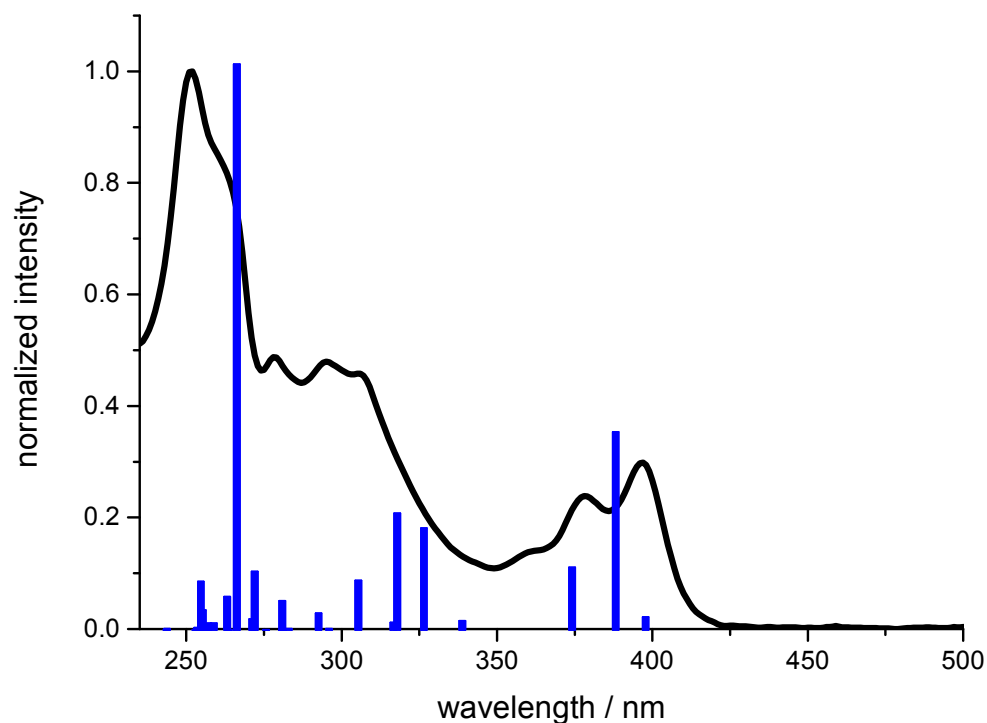

**Figure S30.** UV/Vis absorption spectrum of **2b** and TD-DFT calculated oscillator strength (blue column) in dichloromethane at APFD/6-311G+(2d,p) level.

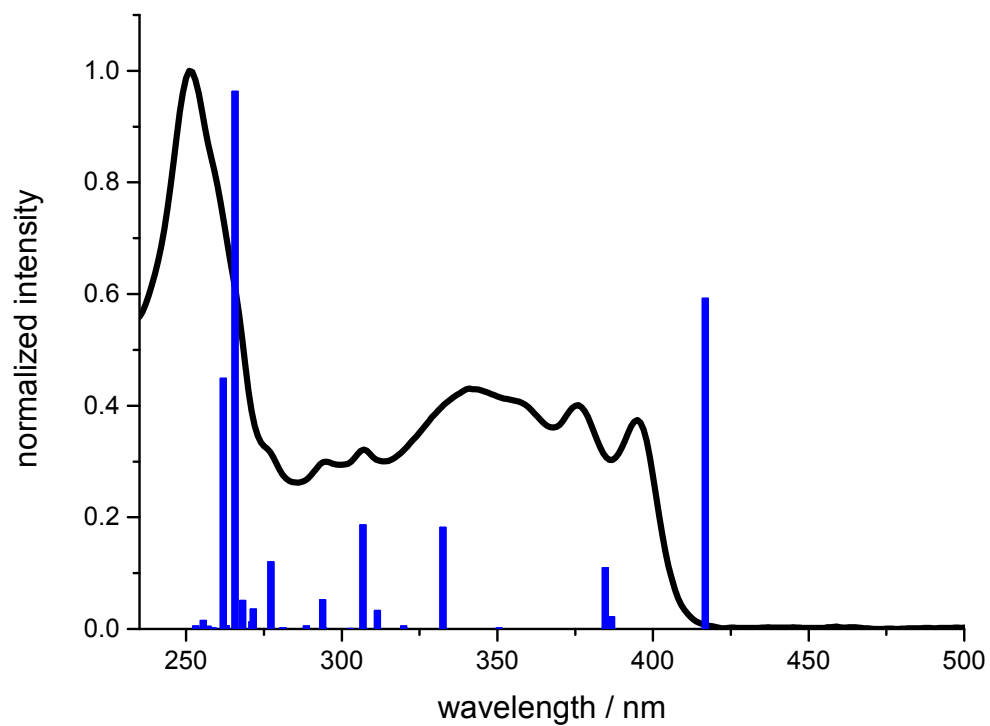

**Figure S31.** UV/Vis absorption spectrum of **2c** and TD-DFT calculated oscillator strength (blue column) in dichloromethane at APFD/6-311G+(2d,p) level.



**Table S7.** TD-DFT calculated electron transitions of **2a** in dichloromethane at APFD /6-311G+(2d,p) level and the corresponding contributions.

|           | transitions                                              | contributions                       | Energy<br>eV | Wavelength<br>nm | Oscillator<br>strength |                                                                                                                                                                                                    |
|-----------|----------------------------------------------------------|-------------------------------------|--------------|------------------|------------------------|----------------------------------------------------------------------------------------------------------------------------------------------------------------------------------------------------|
| Excited 1 | HOMO→LUMO                                                | 98.39%                              | 3.1714       | 390.94           | 0.2066                 | 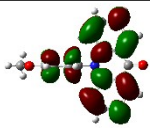<br>LUMO+2                                                                                                      |
| Excited 2 | HOMO-2→LUMO                                              | 96.54%                              | 3.5927       | 345.10           | 0                      | <br>LUMO+1                                                                                                      |
| Excited 3 | HOMO-1→LUMO                                              | 98.59%                              | 3.9362       | 314.99           | 0                      | <br>LUMO                                                                                                        |
| Excited 4 | HOMO-5→LUMO<br>HOMO-3→LUMO<br>HOMO→LUMO+1<br>HOMO→LUMO+2 | 12.72%<br>3.56%<br>79.25%<br>2.49%  | 4.1836       | 296.36           | 0.0368                 | <br>HOMO<br><br>HOMO-1    |
| Excited 5 | HOMO-5→LUMO<br>HOMO-3→LUMO<br>HOMO→LUMO+1<br>HOMO→LUMO+2 | 10.00%<br>5.31%<br>10.85%<br>72.91% | 4.3952       | 282.09           | 0.0155                 | <br>HOMO-2<br><br>HOMO-5 |

**Table S8.** TD-DFT calculated electron transitions of **2b** in dichloromethane at APFD /6-311G+(2d,p) level and the corresponding contributions.

|           | transitions                | contributions    | Energy<br>eV | Wavelength<br>nm | Oscillator<br>strength | 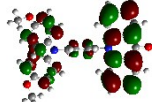                                                                                                                                                                                                                   |
|-----------|----------------------------|------------------|--------------|------------------|------------------------|-------------------------------------------------------------------------------------------------------------------------------------------------------------------------------------------------------------------------------------------------------------------------------------------------------|
| Excited 1 | HOMO→LUMO                  | 99.75%           | 2.3690       | 523.37           | 0.0007                 | LUMO+3<br>                                                                                                                                                                                                         |
| Excited 2 | HOMO→LUMO+1<br>HOMO→LUMO+3 | 90.74%<br>6.32%  | 3.1183       | 397.61           | 0.0300                 | LUMO+2<br><br>LUMO+1<br>                                                                                                        |
| Excited 3 | HOMO-1→LUMO<br>HOMO→LUMO+2 | 82.39%<br>15.32% | 3.1956       | 387.99           | 0.4523                 | LUMO<br>                                                                                                                                                                                                          |
| Excited 4 | HOMO-1→LUMO<br>HOMO→LUMO+2 | 15.46%<br>82.19% | 3.3150       | 374.01           | 0.1431                 | HOMO<br>                                                                                                                                                                                                         |
| Excited 5 | HOMO-4→LUMO<br>HOMO-3→LUMO | 6.05%<br>91.44%  | 3.5032       | 353.92           | 0                      | HOMO-1<br><br>HOMO-3<br><br>HOMO-4<br> |

**Table S9.** TD-DFT calculated electron transitions of **2c** in dichloromethane at APFD /6-311G+(2d,p) level and the corresponding contributions.

|           | transitions                | contributions    | Energy<br>eV | Wavelength<br>nm | Oscillator<br>strength | 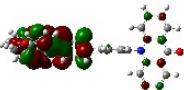                       |
|-----------|----------------------------|------------------|--------------|------------------|------------------------|-----------------------------------------------------------------------------------------------------------|
| Excited 1 | HOMO→LUMO                  | 99.79%           | 2.4349       | 509.19           | 0.0001                 | LUMO+3<br>             |
| Excited 2 | HOMO→LUMO+1                | 96.44%           | 2.9743       | 416.85           | 0.8064                 | LUMO+2<br>             |
| Excited 3 | HOMO→LUMO+2<br>HOMO→LUMO+3 | 10.63%<br>87.75% | 3.2059       | 386.74           | 0.0290                 | LUMO+1<br>LUMO<br>    |
| Excited 4 | HOMO-1→LUMO                | 96.89%           | 3.2226       | 384.73           | 0.1483                 | HOMO<br>             |
| Excited 5 | HOMO-4→LUMO                | 97.19%           | 3.5001       | 354.23           | 0                      | HOMO-1<br>HOMO-4<br> |

### Cartesian coordinates for theoretically optimized structures of 2a-2c

2a opt B3LYP/6-31G(d)

HF = -976.4006948 hartree

---

|   |             |             |             |
|---|-------------|-------------|-------------|
| C | 1.03117322  | -3.64598290 | 0.01987237  |
| C | 0.33858264  | -2.44542508 | 0.04866693  |
| C | 1.03861455  | -1.21955241 | 0.01533471  |
| C | 2.45175185  | -1.24483194 | -0.04770624 |
| C | 3.12575666  | -2.47781091 | -0.07612261 |
| C | 2.43292936  | -3.67478426 | -0.04310324 |
| C | 2.45162277  | 1.24497350  | -0.04782586 |
| C | 1.03849414  | 1.21954993  | 0.01536916  |
| C | 0.33835358  | 2.44536159  | 0.04893149  |
| H | -0.74289174 | 2.44843152  | 0.09810538  |
| C | 1.03082223  | 3.64598321  | 0.02007496  |
| C | 2.43256637  | 3.67492525  | -0.04317909 |
| C | 3.12550298  | 2.47802261  | -0.07632288 |
| H | 0.47041689  | -4.57606851 | 0.04712089  |
| H | -0.74267237 | -2.44860165 | 0.09762841  |
| H | 4.20895428  | -2.44074319 | -0.12465690 |
| H | 2.96220404  | -4.62198801 | -0.06508103 |
| H | 0.46998691  | 4.57601546  | 0.04752610  |
| H | 2.96173776  | 4.62218401  | -0.06526661 |
| H | 4.20869956  | 2.44105602  | -0.12496081 |
| C | -1.08593471 | -0.00009248 | 0.10806462  |
| C | -1.73622820 | -0.00017420 | 1.34883708  |
| C | -1.84146818 | -0.00004932 | -1.06301382 |
| C | -3.12272668 | -0.00020335 | 1.41229789  |
| H | -1.14588170 | -0.00023626 | 2.25961842  |
| C | -3.23726738 | -0.00005654 | -1.01124520 |
| H | -1.33465550 | -0.00000560 | -2.02289937 |
| C | -3.88344580 | -0.00011928 | 0.23176827  |
| H | -3.64315599 | -0.00027746 | 2.36390287  |
| H | -3.80221557 | -0.00007500 | -1.93522462 |
| C | -6.06185572 | 0.00001420  | -0.75247836 |

---

---

|   |             |             |             |
|---|-------------|-------------|-------------|
| H | -5.89817109 | -0.89427998 | -1.36652166 |
| H | -7.08840513 | 0.00017255  | -0.38459636 |
| H | -5.89800266 | 0.89421773  | -1.36661934 |
| O | -5.23368710 | -0.00001663 | 0.40237776  |
| C | 3.23956458  | 0.00011384  | -0.08430074 |
| O | 4.47170940  | 0.00017156  | -0.14086147 |
| N | 0.35271775  | -0.00002997 | 0.04375395  |

---

**2b** opt B3LYP/6-31G(d)

HF = -1608.3871845 hartree

---

|   |             |             |             |
|---|-------------|-------------|-------------|
| C | -3.91872108 | 2.39479425  | 2.74170961  |
| C | -3.24481528 | 1.59246638  | 1.83430675  |
| C | -3.96471696 | 0.77438843  | 0.93588489  |
| C | -5.37878198 | 0.79298419  | 0.98382447  |
| C | -6.03367688 | 1.61728145  | 1.91506378  |
| C | -5.32133630 | 2.41589203  | 2.79165263  |
| C | -6.18700837 | -0.03794263 | 0.07406117  |
| C | -5.41776975 | -0.87045567 | -0.86729886 |
| C | -4.00290593 | -0.85400692 | -0.87695786 |
| C | -3.32121172 | -1.67366119 | -1.80317023 |
| H | -2.23913564 | -1.67495302 | -1.82660698 |
| C | -4.03257875 | -2.47568911 | -2.68180353 |
| C | -5.43610527 | -2.49462582 | -2.67474757 |
| C | -6.11117975 | -1.69439446 | -1.77062449 |
| H | -3.34280058 | 3.01492747  | 3.42300987  |
| H | -2.16266846 | 1.59164742  | 1.81394910  |
| H | -7.11834212 | 1.59346982  | 1.90944156  |
| H | -5.83592154 | 3.04893945  | 3.50744378  |
| H | -3.48566098 | -3.09741695 | -3.38513193 |
| H | -5.98018457 | -3.12754525 | -3.36848630 |
| H | -7.19468255 | -1.66907202 | -1.72101778 |
| C | -1.85673311 | -0.03982717 | -0.01495710 |
| C | -1.13196640 | -0.93361776 | 0.77763142  |

---

---

|   |             |             |             |
|---|-------------|-------------|-------------|
| C | -1.16644145 | 0.85471360  | -0.83759756 |
| C | 0.25873528  | -0.93187082 | 0.75635100  |
| H | -1.66413920 | -1.62415147 | 1.42466994  |
| C | 0.22355947  | 0.85464681  | -0.87428045 |
| H | -1.72608843 | 1.54414738  | -1.46225362 |
| C | 0.96473013  | -0.03828537 | -0.07400830 |
| H | 0.80635838  | -1.62198819 | 1.38740868  |
| H | 0.74389859  | 1.54499611  | -1.52780717 |
| N | 2.37069884  | -0.03893320 | -0.10543026 |
| C | 3.09784325  | 1.15485157  | -0.39871596 |
| C | 4.12255930  | 1.14360530  | -1.35975442 |
| C | 2.82442621  | 2.34994131  | 0.27379045  |
| C | 4.84993878  | 2.29281800  | -1.63291170 |
| H | 4.34684012  | 0.22221760  | -1.88713972 |
| C | 3.53626200  | 3.51706897  | -0.01142964 |
| H | 2.04182714  | 2.37191731  | 1.02534920  |
| C | 4.55987747  | 3.49249312  | -0.96555076 |
| H | 5.64336828  | 2.29038162  | -2.37282957 |
| H | 3.29413065  | 4.42636009  | 0.52540239  |
| C | 3.10799411  | -1.22984884 | 0.17382240  |
| C | 4.16687555  | -1.21365265 | 1.08592518  |
| C | 2.80435341  | -2.43510829 | -0.48266761 |
| C | 4.91669305  | -2.36377049 | 1.34129070  |
| H | 4.41410616  | -0.28883688 | 1.59690190  |
| C | 3.52951225  | -3.58760966 | -0.21799212 |
| H | 1.99164434  | -2.46140747 | -1.20127827 |
| C | 4.59616762  | -3.56199988 | 0.69357427  |
| H | 5.73399623  | -2.31308068 | 2.05053139  |
| H | 3.29932014  | -4.52137835 | -0.72010219 |
| O | -7.42049111 | -0.03656747 | 0.09905788  |
| N | -3.29700553 | -0.03998844 | 0.01532852  |
| C | 5.07682157  | 5.80634551  | -0.67114223 |
| H | 5.78694216  | 6.51585710  | -1.09793644 |
| C | 6.33913910  | -4.77886857 | 1.78373411  |

---

---

|   |            |             |             |
|---|------------|-------------|-------------|
| H | 6.71194728 | -5.80389552 | 1.77071334  |
| H | 5.24049289 | 5.74036695  | 0.41218825  |
| H | 4.05543698 | 6.16218598  | -0.85784097 |
| H | 6.02161746 | -4.52381888 | 2.80294507  |
| H | 7.14455036 | -4.09839360 | 1.47878189  |
| O | 5.32597840 | 4.56691672  | -1.31543764 |
| O | 5.25201977 | -4.74576903 | 0.87242125  |

---

**2c** opt B3LYP/6-31G(d)

HF = -1839.4509874 hartree

---

|   |             |             |             |
|---|-------------|-------------|-------------|
| C | -6.25461854 | 0.79767828  | -3.55739511 |
| C | -5.56167442 | 0.53477352  | -2.38591535 |
| C | -6.26315380 | 0.26716023  | -1.18994700 |
| C | -7.67771507 | 0.27292616  | -1.21461854 |
| C | -8.35189413 | 0.54302948  | -2.41790623 |
| C | -7.65786500 | 0.80471149  | -3.58564306 |
| C | -7.67775158 | -0.27295093 | 1.21453096  |
| C | -6.26318946 | -0.26715349 | 1.18990839  |
| C | -5.56174592 | -0.53474872 | 2.38590198  |
| H | -4.47933851 | -0.53452802 | 2.38909270  |
| C | -6.25472485 | -0.79767105 | 3.55735687  |
| C | -7.65797242 | -0.80473845 | 3.58555556  |
| C | -8.35196663 | -0.54307071 | 2.41779490  |
| H | -5.69293113 | 1.00059833  | -4.46489450 |
| H | -4.47926689 | 0.53457912  | -2.38906745 |
| H | -9.43619335 | 0.53517620  | -2.38197996 |
| H | -8.18730048 | 1.01213980  | -4.51003950 |
| H | -5.69306464 | -1.00057775 | 4.46487613  |
| H | -8.18743537 | -1.01218071 | 4.50993316  |
| H | -9.43626479 | -0.53524099 | 2.38183128  |
| C | -4.13669947 | 0.00000587  | 0.00001447  |
| C | -3.43434122 | 1.17904848  | 0.26076838  |

---

---

|   |             |             |             |
|---|-------------|-------------|-------------|
| C | -3.43434454 | -1.17904442 | -0.26071817 |
| C | -2.04197520 | 1.17499776  | 0.26397164  |
| H | -3.98419299 | 2.09078447  | 0.47244227  |
| C | -2.04197958 | -1.17500505 | -0.26387581 |
| H | -3.98419905 | -2.09077461 | -0.47241041 |
| C | -1.31406947 | -0.00000656 | 0.00005991  |
| H | -1.51009145 | 2.09105865  | 0.50013771  |
| H | -1.51009539 | -2.09107035 | -0.50002313 |
| C | 0.16642870  | -0.00001955 | 0.00008449  |
| C | 0.90015844  | 1.11176524  | -0.44894590 |
| C | 0.90013416  | -1.11180872 | 0.44914150  |
| C | 2.28892954  | 1.11585189  | -0.45843424 |
| H | 0.37432791  | 1.97810510  | -0.83956974 |
| C | 2.28890506  | -1.11591162 | 0.45865621  |
| H | 0.37429441  | -1.97814449 | 0.83976042  |
| C | 3.01494639  | -0.00003882 | 0.00010899  |
| H | 2.82152584  | 1.98139375  | -0.83585240 |
| H | 2.82148221  | -1.98145410 | 0.83610046  |
| N | 4.42284127  | -0.00003589 | 0.00017181  |
| C | 5.15127673  | -1.21582393 | -0.16523008 |
| C | 6.20431087  | -1.53818569 | 0.69608288  |
| C | 4.84242095  | -2.10425269 | -1.21001673 |
| C | 6.94304671  | -2.71085600 | 0.52562353  |
| H | 6.45483259  | -0.86067912 | 1.50583804  |
| C | 5.55698882  | -3.28222169 | -1.37269944 |
| H | 4.03338854  | -1.86424683 | -1.89215750 |
| C | 6.61741553  | -3.59505597 | -0.50886114 |
| H | 7.75503369  | -2.92582521 | 1.20988114  |
| H | 5.32230157  | -3.97242992 | -2.17625242 |
| C | 5.15122834  | 1.21582412  | 0.16540646  |
| C | 6.20396495  | 1.53830951  | -0.69621944 |
| C | 4.84258183  | 2.10417068  | 1.21031271  |
| C | 6.94267369  | 2.71101526  | -0.52589933 |
| H | 6.45426685  | 0.86085703  | -1.50608897 |

---



---

|   |             |             |             |
|---|-------------|-------------|-------------|
| C | 5.55711683  | 3.28218119  | 1.37287060  |
| H | 4.03374889  | 1.86407239  | 1.89265491  |
| C | 6.61728667  | 3.59510916  | 0.50876449  |
| H | 7.75440868  | 2.92612990  | -1.21040312 |
| H | 5.32256568  | 3.97235106  | 2.17649541  |
| N | -5.57754964 | 0.00001253  | -0.00000674 |
| C | 8.33963109  | 5.14048641  | -0.08439871 |
| H | 8.70461506  | 6.09744729  | 0.29113208  |
| H | 9.15395428  | 4.40523521  | -0.04865172 |
| H | 8.01390947  | 5.26261762  | -1.12546673 |
| C | 8.33982212  | -5.14046953 | 0.08410473  |
| H | 8.01429768  | -5.26212270 | 1.12529652  |
| H | 8.70445954  | -6.09767314 | -0.29115028 |
| H | 9.15433851  | -4.40545707 | 0.04791654  |
| O | 7.26282016  | -4.77190670 | -0.76238717 |
| O | 7.26272464  | 4.77194433  | 0.76221932  |
| C | -8.46641656 | -0.00001880 | -0.00005701 |
| O | -9.69997429 | -0.00002905 | -0.00007796 |

---

## 9. References

[S1] C. F. H. Allen, G. H. W. McKee, *Org. Synth.* **1939**, *19*, 6.

[S2] Ł. Skórka, P. Kurzep, G. Wiosna-Sałyga, B. Łuszczynska, I. Wielgus, Z. Wróbel, J. Ulański, I. Kulszewicz-Bajer, *Synth. Met.* **2017**, *228*, 1.

[S3] B. Xu, H. Tian, D. Bi, E. Gabrielsson, E. M. J. Johansson, G. Boschloo, A. Hagfeldt, L. Sun, *J. Mater. Chem. A* **2013**, *1*, 14467.
